# Supplementary material for: El "lied" en Roberto Schumann: En torno a un centenario
Source: MDPI journal article supplement (doi:10.3390/cancers13081810), 1956-01-01
Supplement: s1 [file s1]

# Supplementary Materials: Functional Characterization of Circulating Tumor Cells (CTCs) from Metastatic ER+/HER2– Breast Cancer Reveals Dependence on HER2 and FOXM1 for Endocrine Therapy Resistance and Tumor Cell Survival: Implications for Treatment of ER+/HER2– Breast Cancer

Sven Roßwag, Cristina L. Cotarelo, Klaus Pantel, Sabine Riethdorf, Jonathan P. Sleeman, Marcus Schmidt and Sonja Thaler

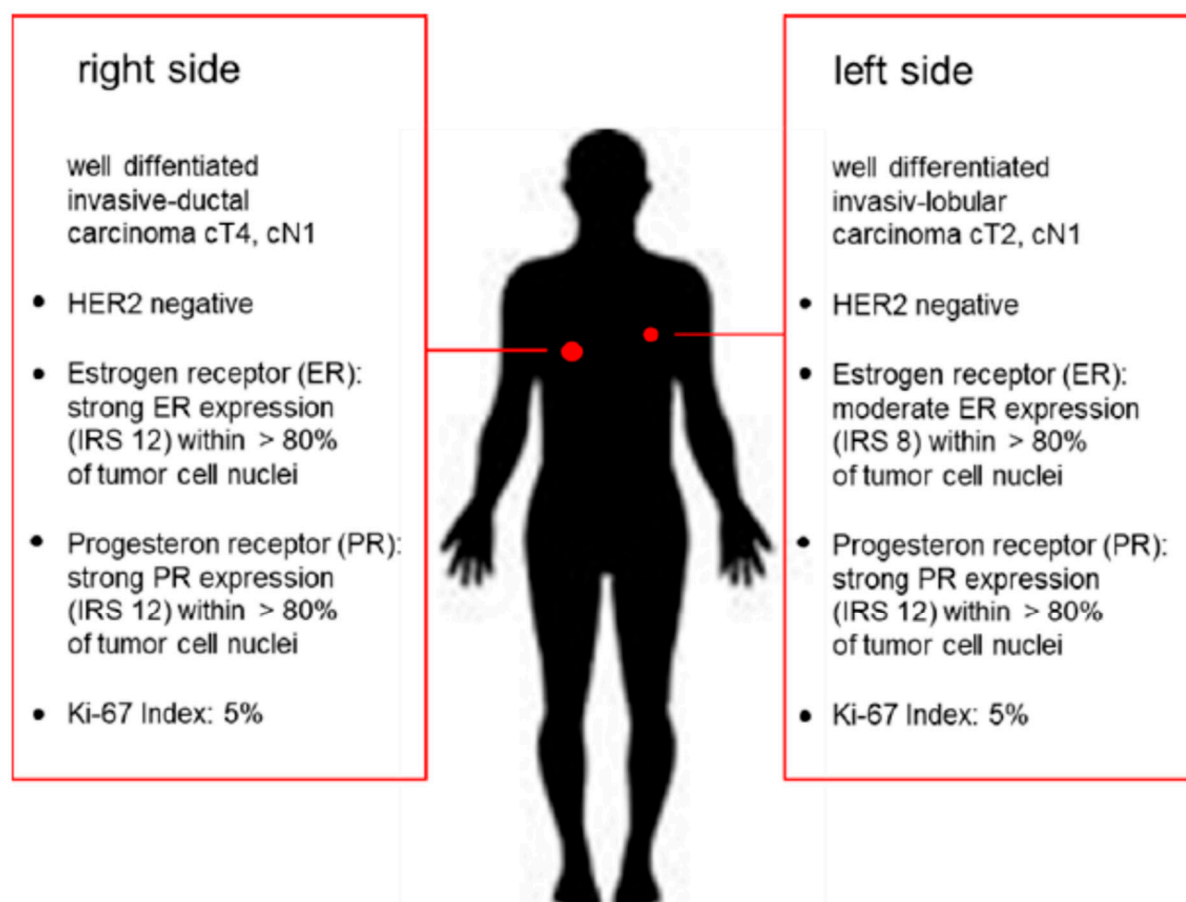

**Figure S1.** CTCs were derived from a patient with bi-lateral metastatic breast cancer. The patient was originally diagnosed with an invasive ductal carcinoma and an invasive lobular carcinoma. Characteristics of the tumors are given in the Figure.

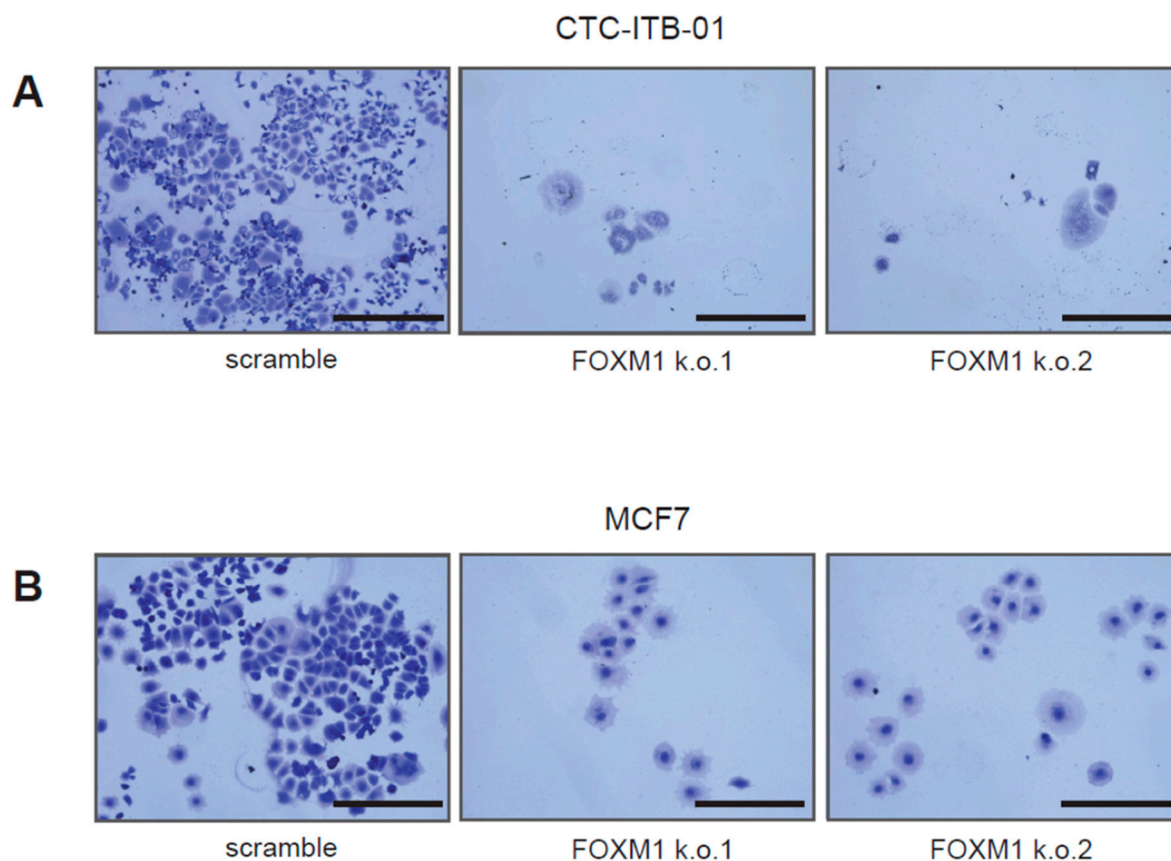

**Figure S2.** (A) + (B) Knockdown of FOXM1 displays differences between CTC-ITB-01 and MCF7 cells. (B) Knockdown of FOXM1 in MCF7 cells causes less reduction of colonies as observed within CTC-ITB-01 and induction of senescence as monitored by typical morphological changes. (A) In CTC-ITB-01 cells, we observed less cells with senescence-like morphology and cell debris indicating that FOXM1 knockdown causes mainly induction of senescence within MCF7 and more cell death within CTC-ITB-01 cells. Bar 400  $\mu$ m.

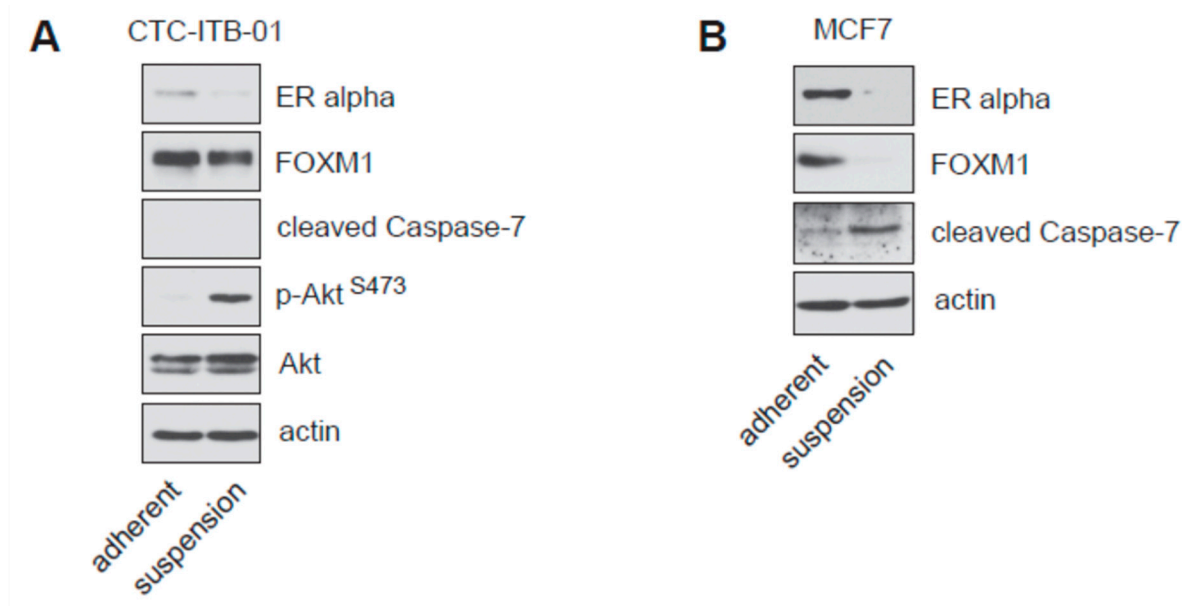

**Figure S3.** (A) + (B) CTC-ITB-01 and MCF7 cells were grown on cell culture plates or cultured in suspension. 24 hours after seeding cells on tissue culture plates or taking cells in suspension CTC-ITB-01 and MCF7 cells were harvested and lysates were analysed by western blotting and probed by using the indicated antibodies.

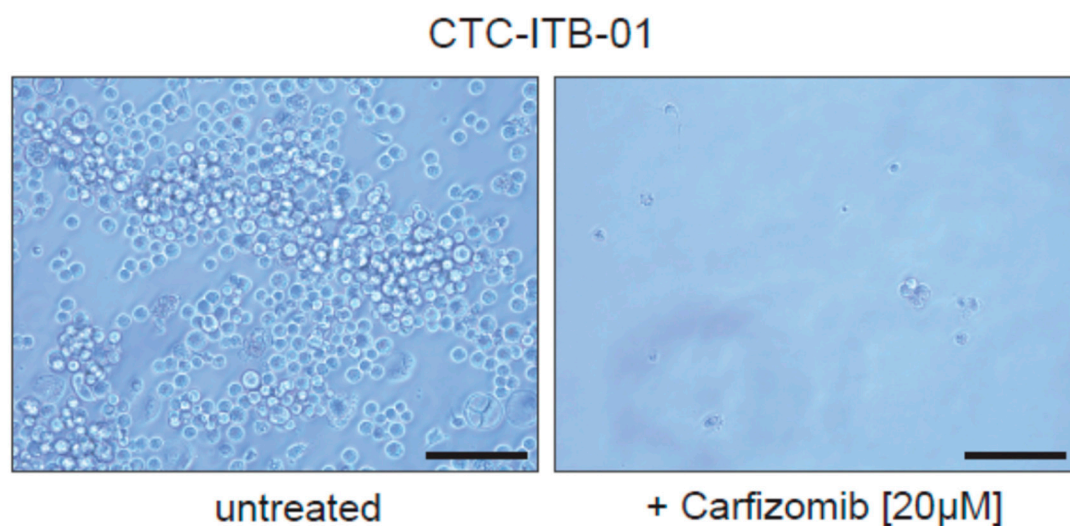

**Figure S4.** CTC-ITB-01 cells were cultured in suspension in the absence or presence of 30 µM carfilzomib. After five days carfilzomib treatment lead to induction of apoptotic cell death.

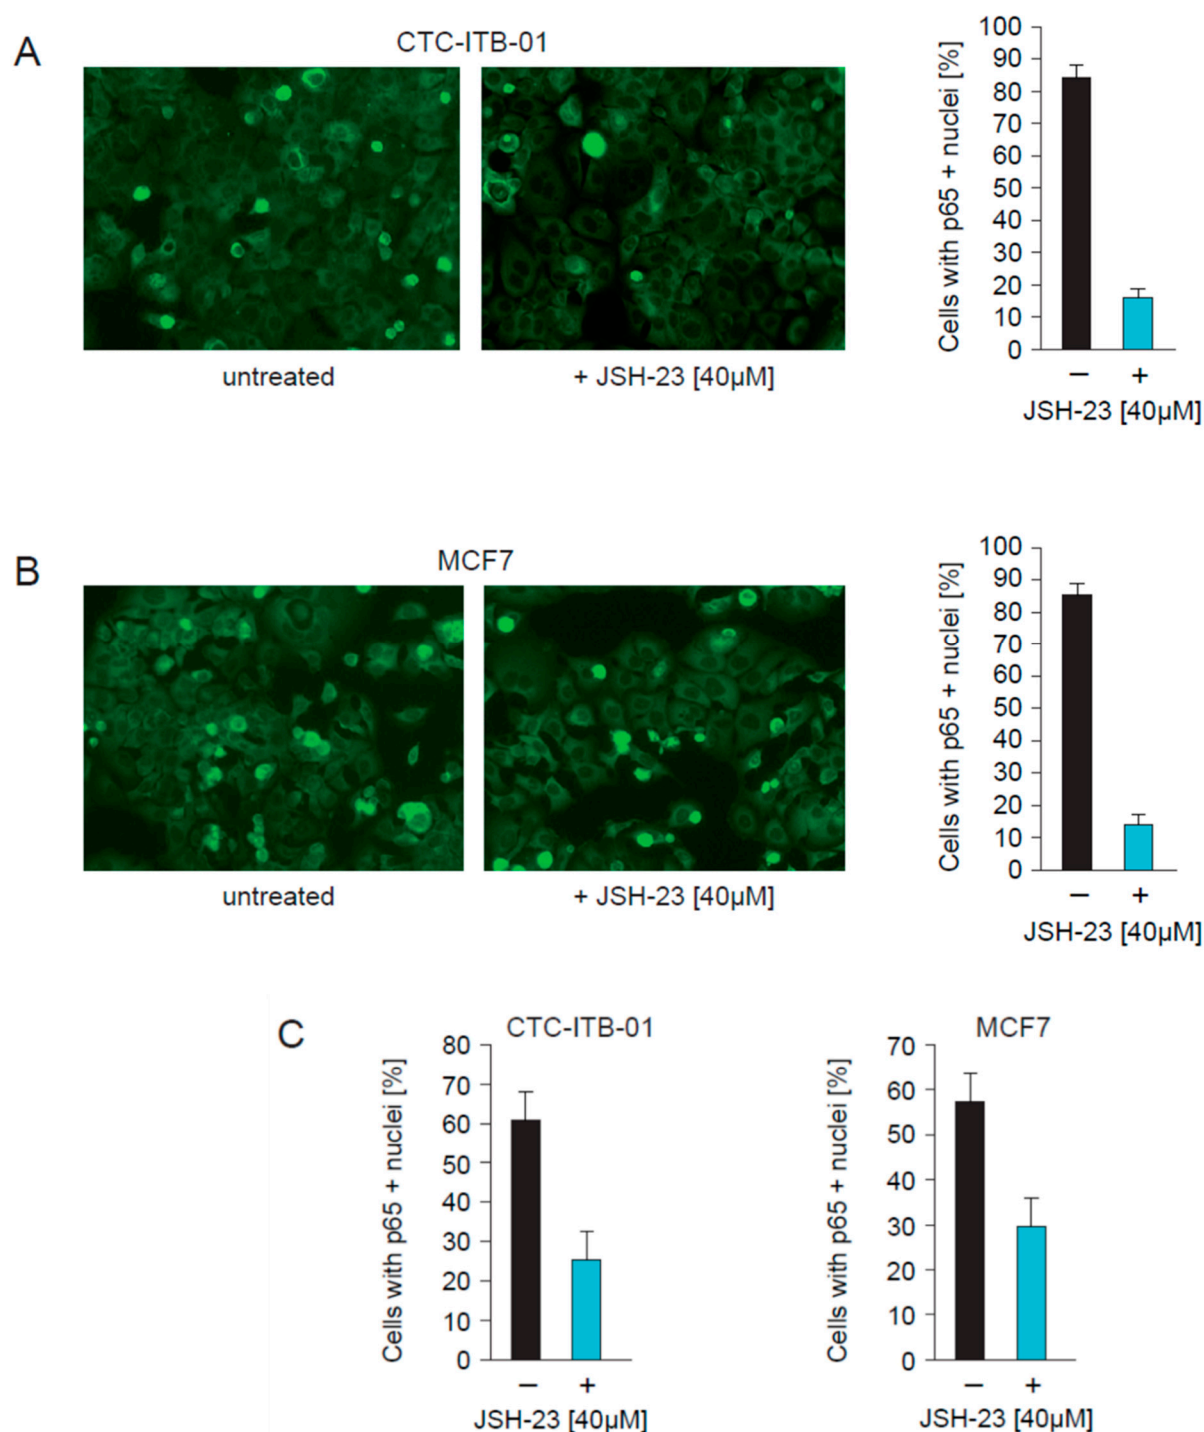

**Figure S5.** (A) + (B) CTC-ITB-01 and MCF7 cells were serum starved overnight, then treated with  $\text{TNF}\alpha$  + JSH-23 or with  $\text{TNF}\alpha$  alone, and subsequently fixed and stained with an NFkB p65 antibody 20 min after  $\text{TNF}\alpha$  treatment. In the presence of JSH-23 a strong reduction of cells with p65+ nuclei in the CTC-ITB-01 cells and in the MCF7 cells was observed. (C) After establishing the NF-kB p65 staining in this way, we cultured CTC-ITB-01 and MCF7 cells with JSH-23 as described in Figure 6D in the manuscript. Afterwards we repeated the NF-kB p65 staining and quantified the percentage of cells with p65+ nuclei. Again, we observed strong reduction of cells with p65+ nuclei (C) CTC-ITB-01 left panel, MCF7 cells right panel.



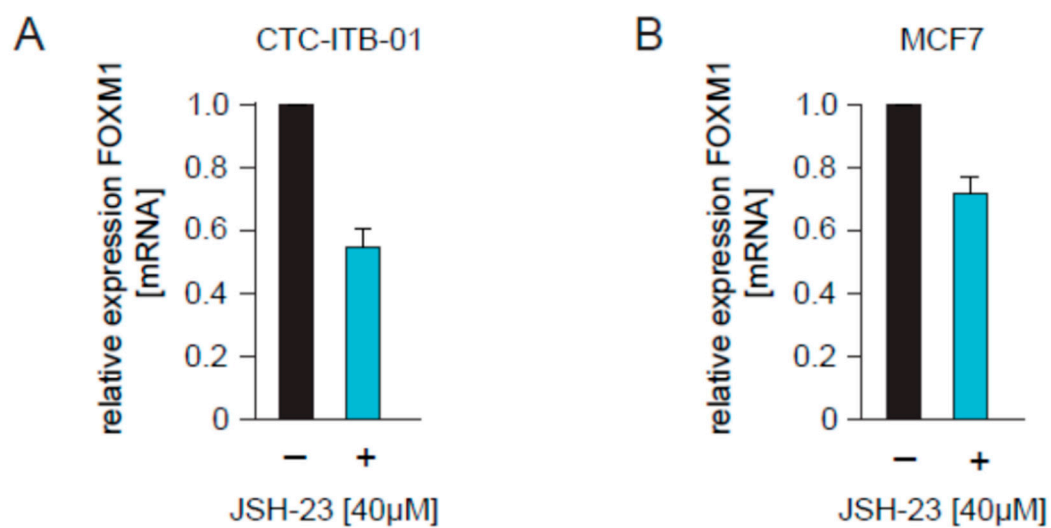

**Figure S6.** (A) + (B) CTC-ITB-01 and MCF7 cells were cultured in the presence or absence of JSH-23. mRNA was harvested and FOXM1 transcripts were quantified by qPCR.

Figure 1B

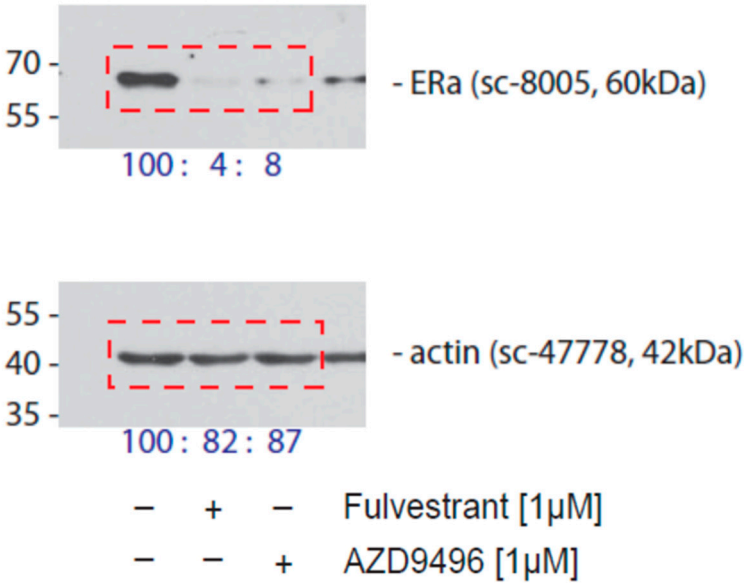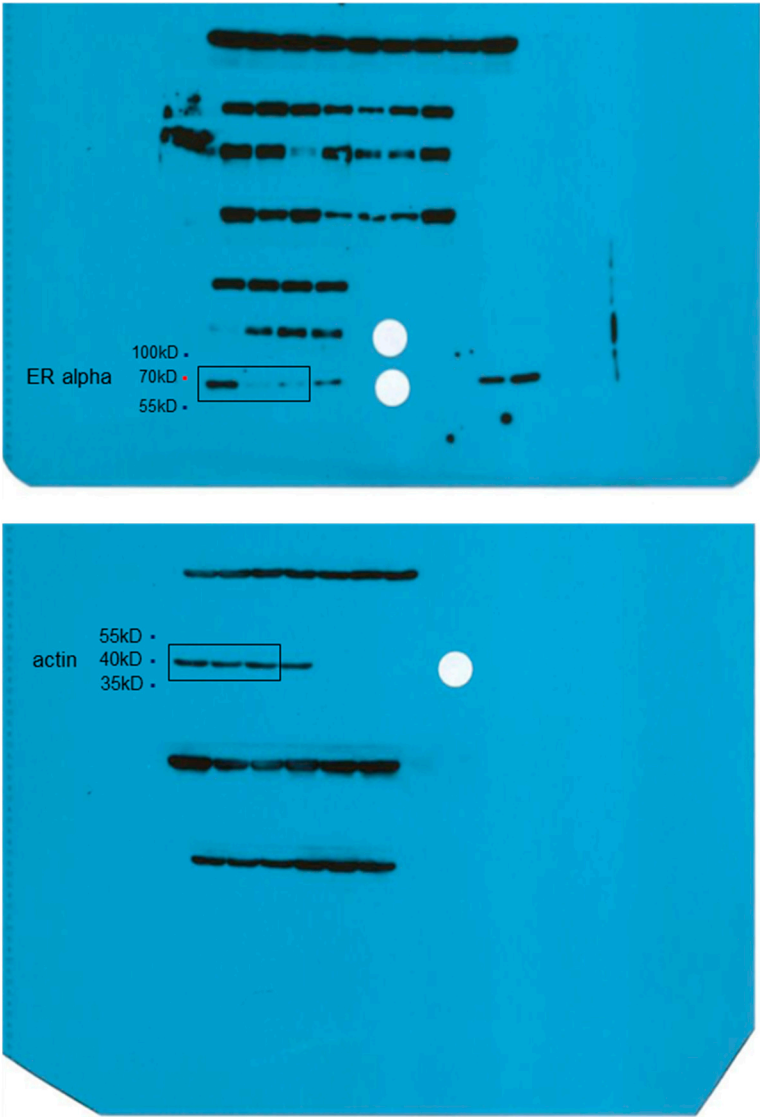

Figure 1C

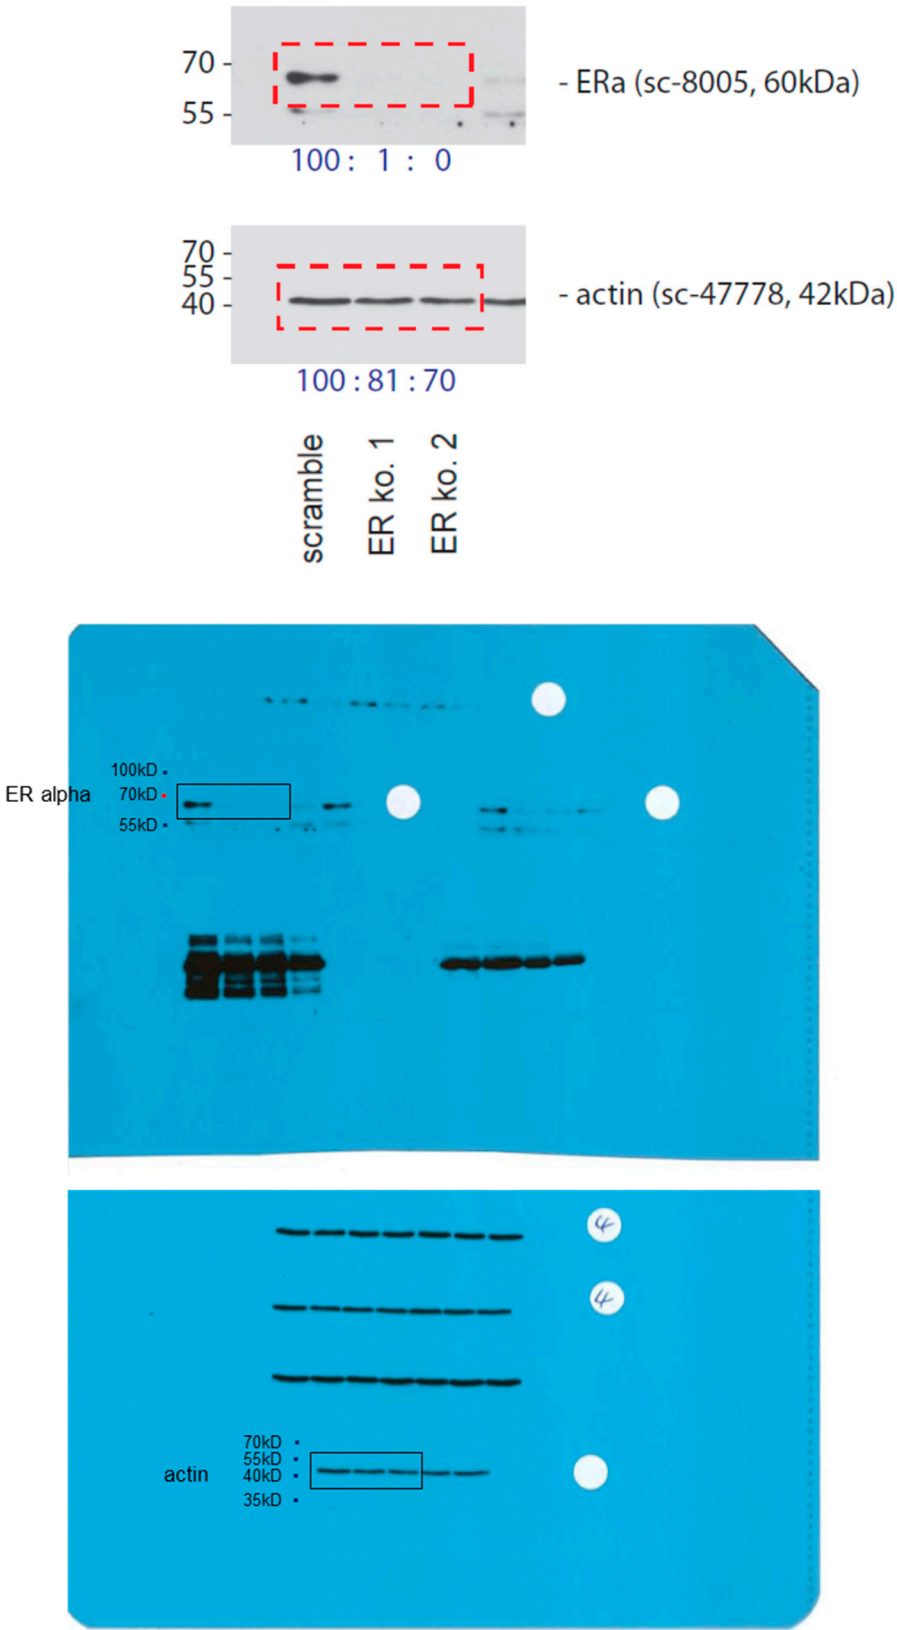

Figure 1D

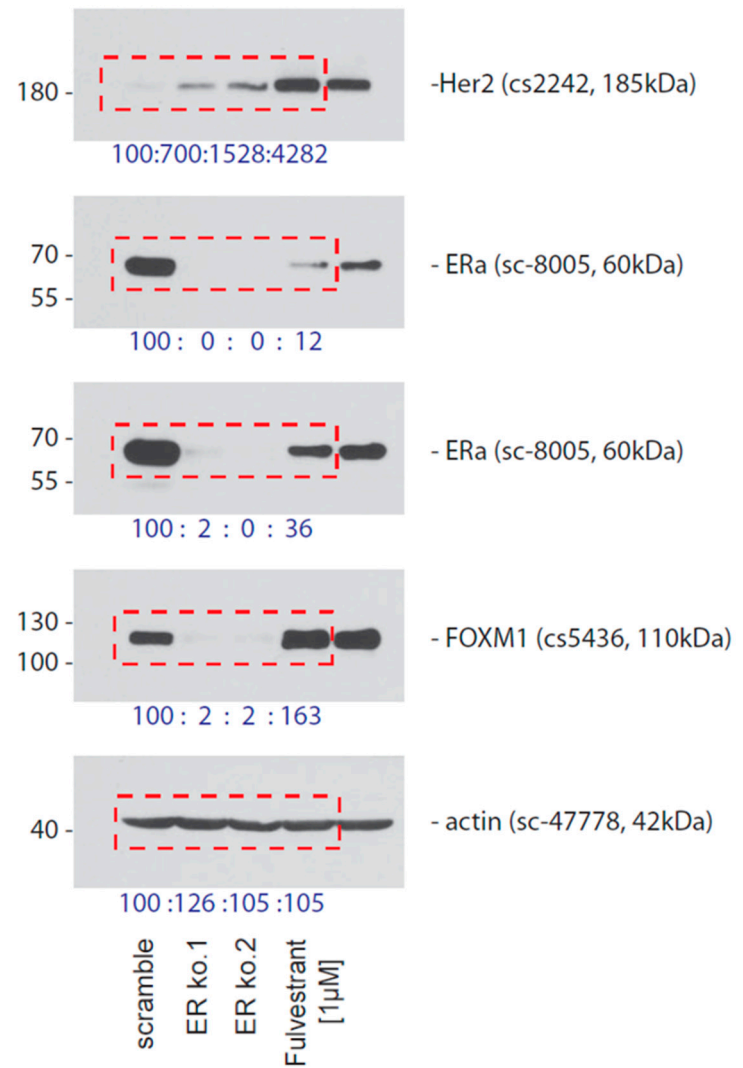

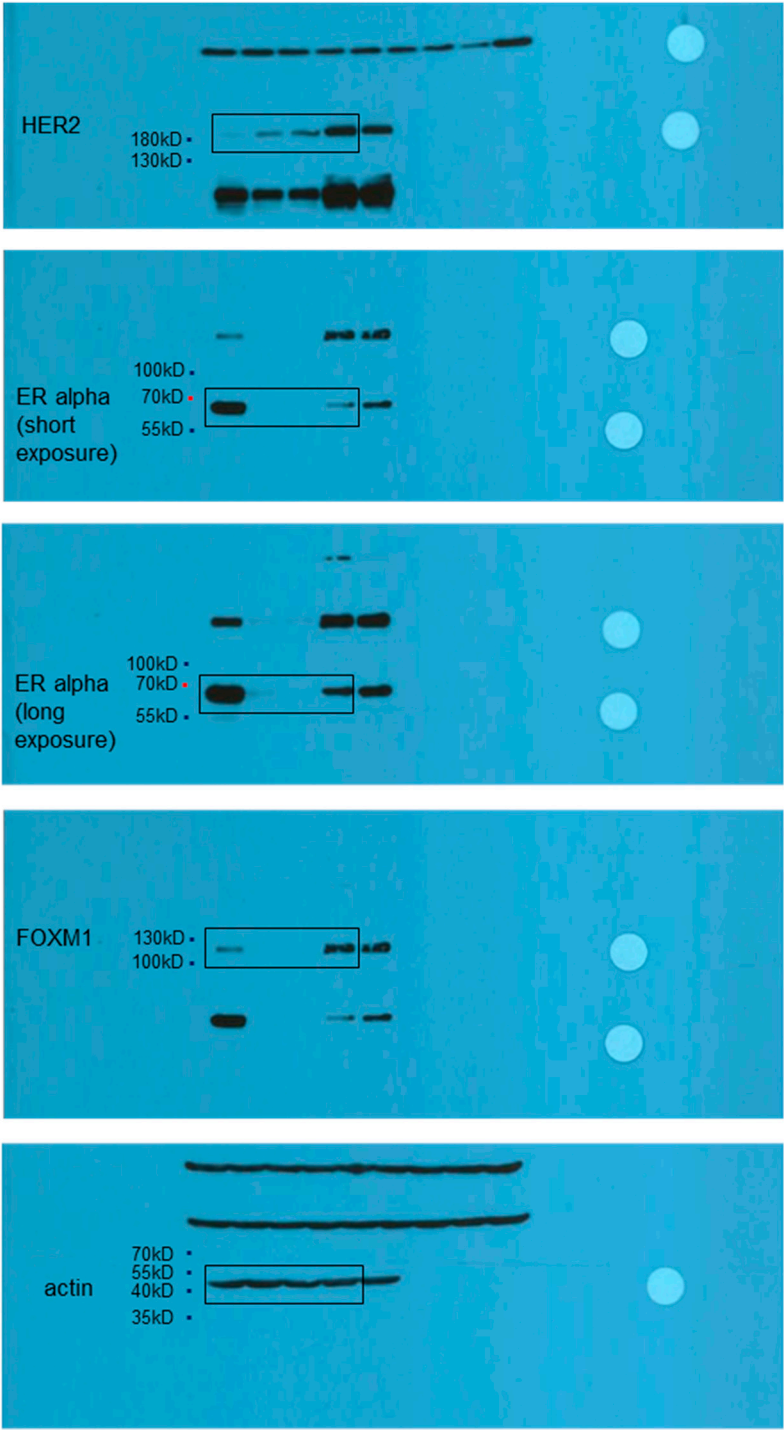



Figure 2A

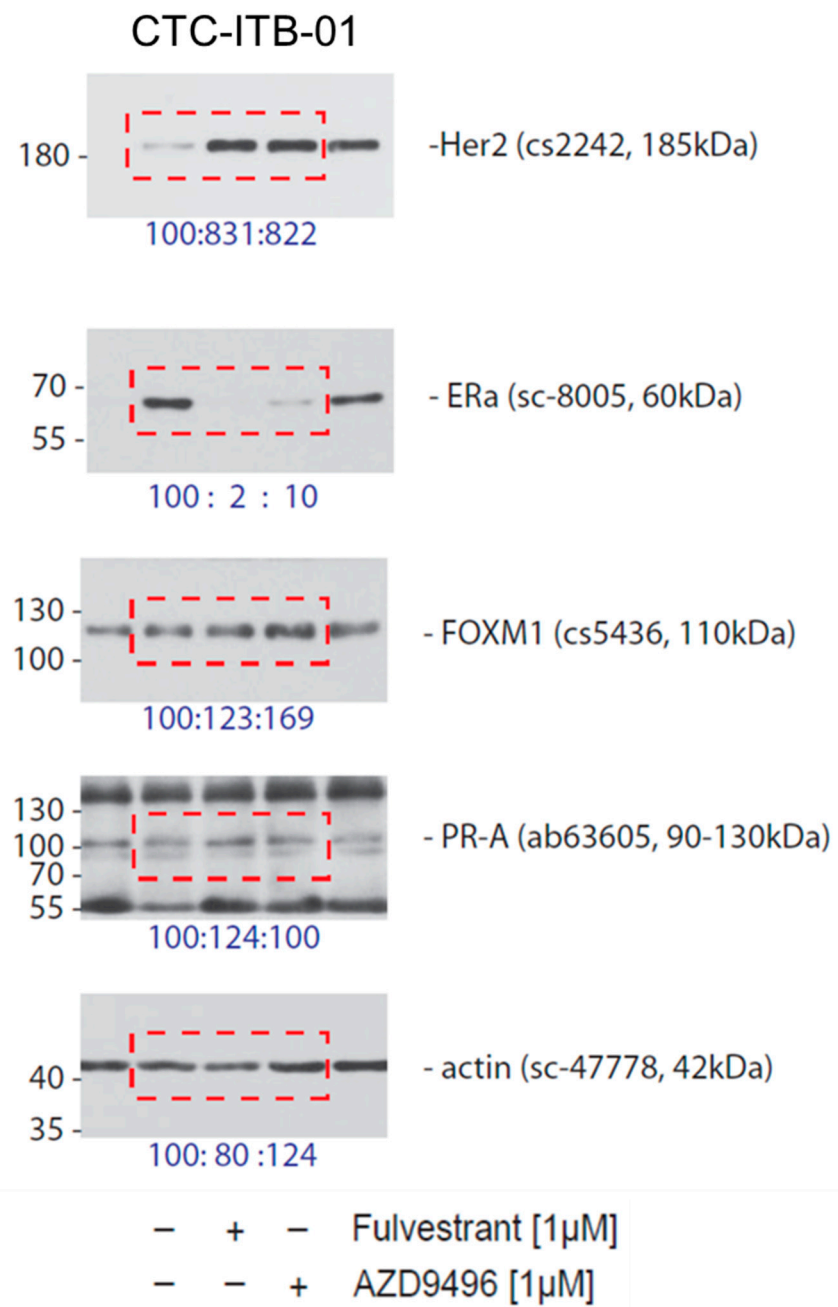

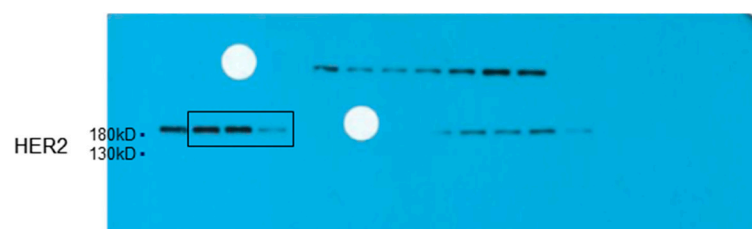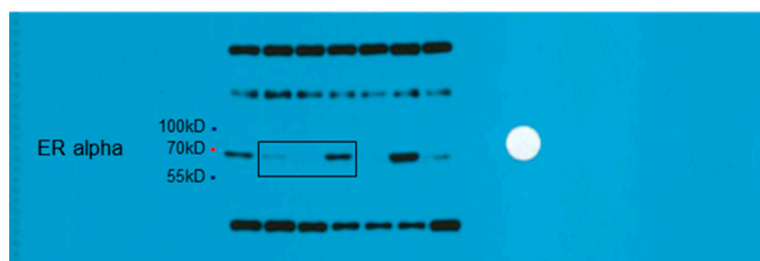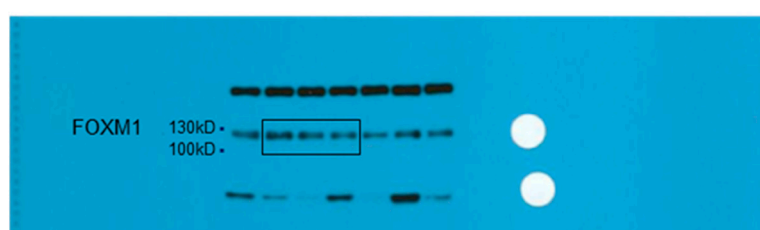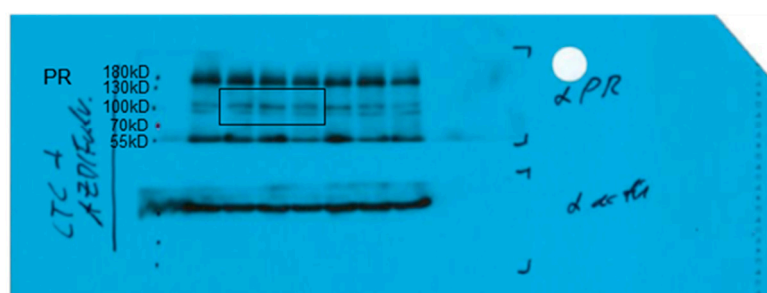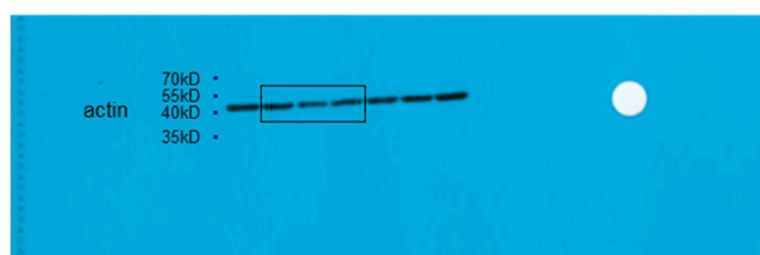

Figure 2C

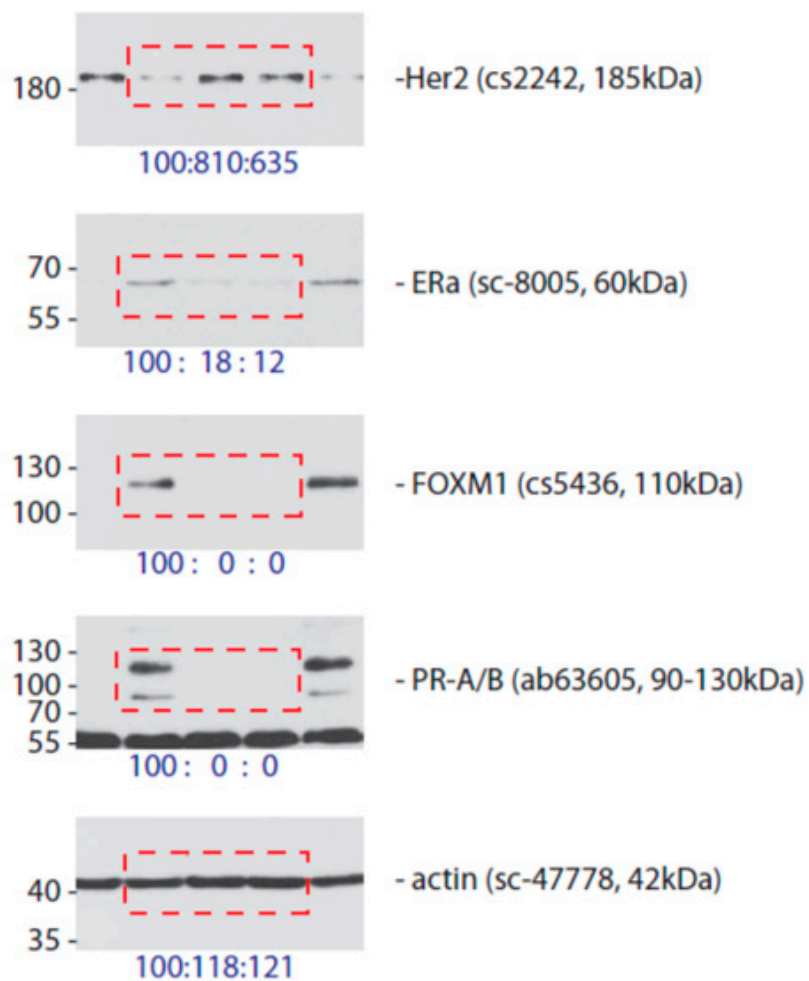

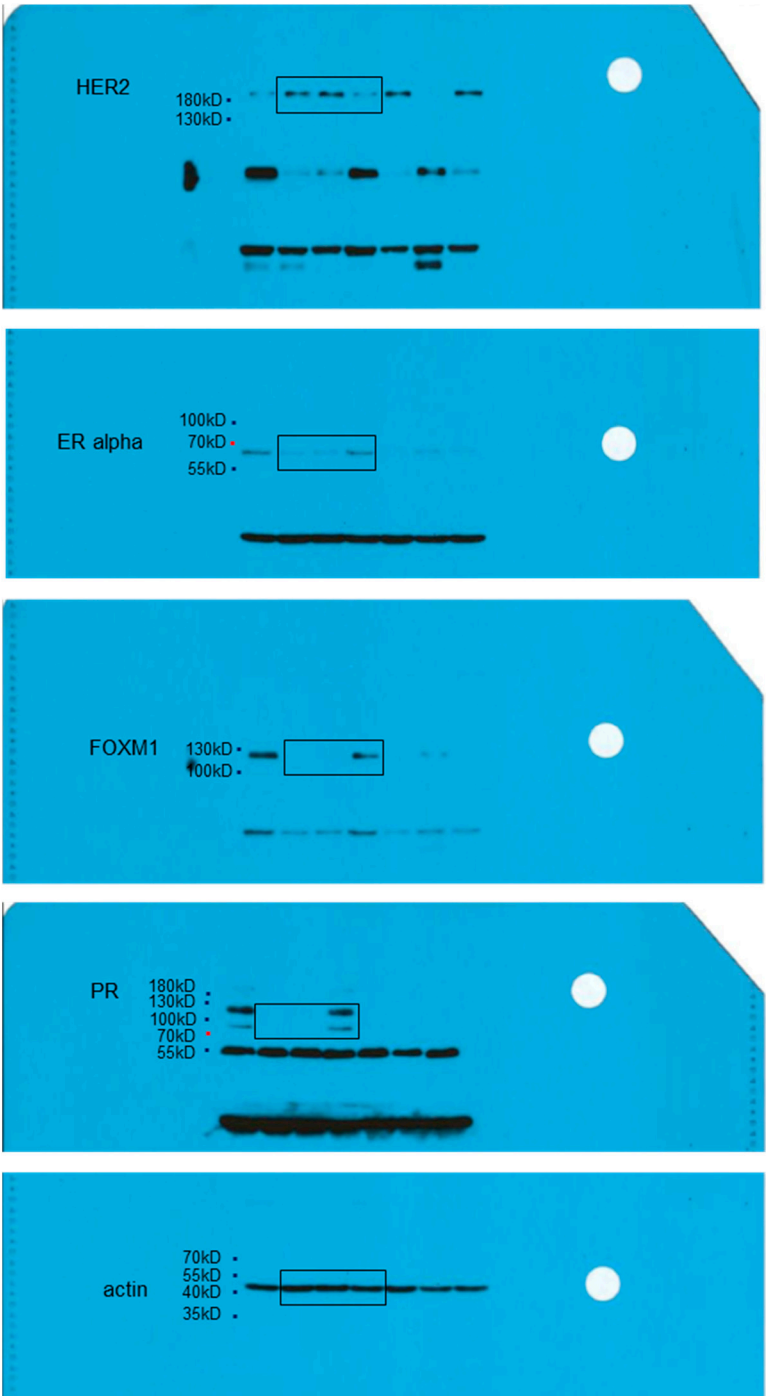

Figure 3A

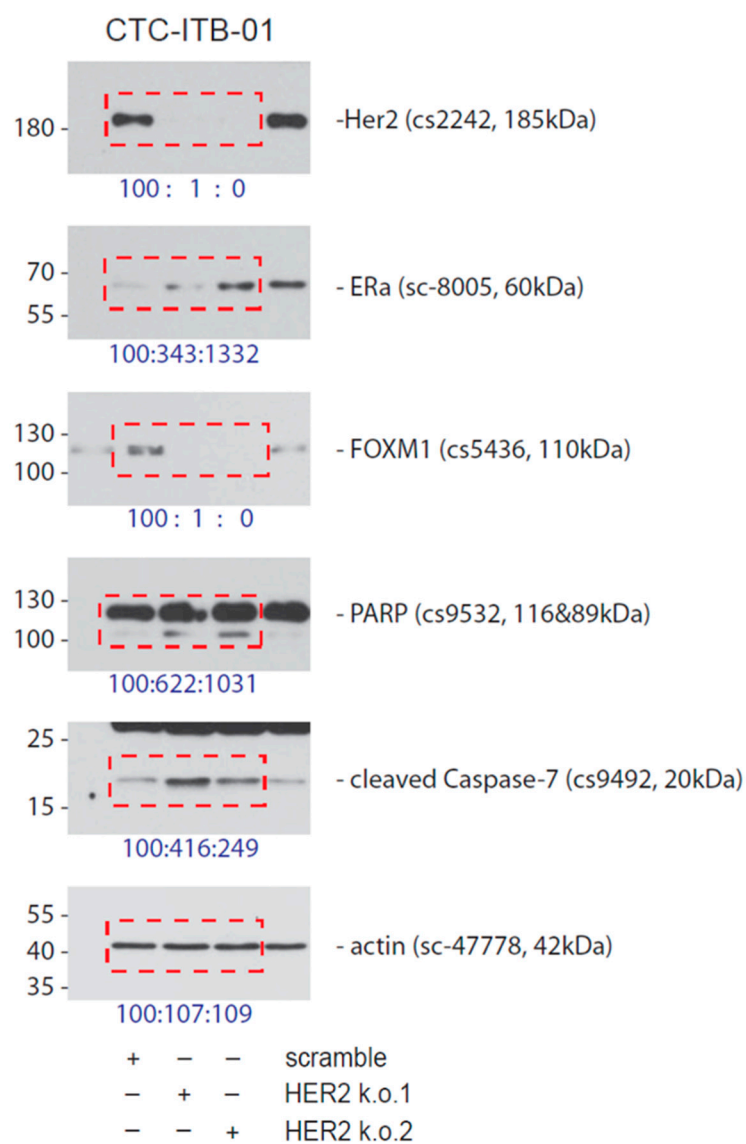



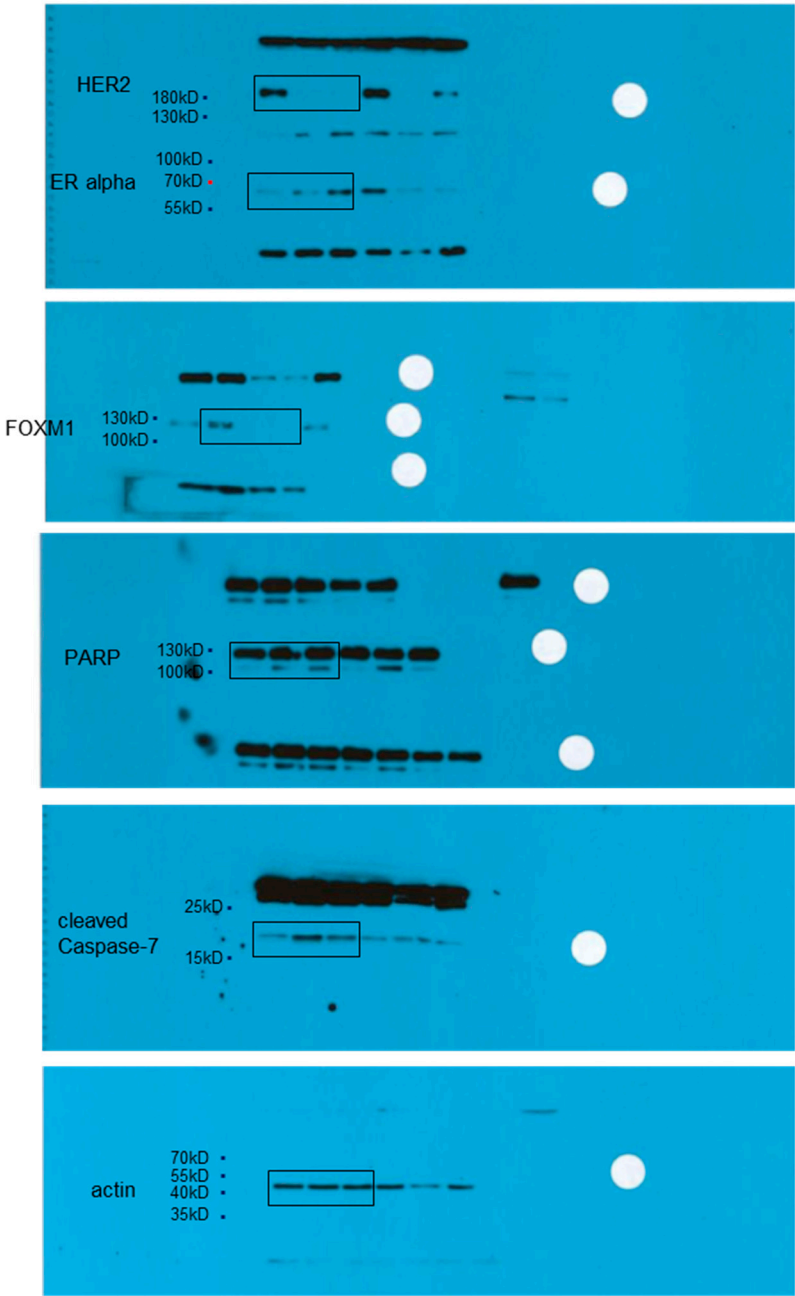

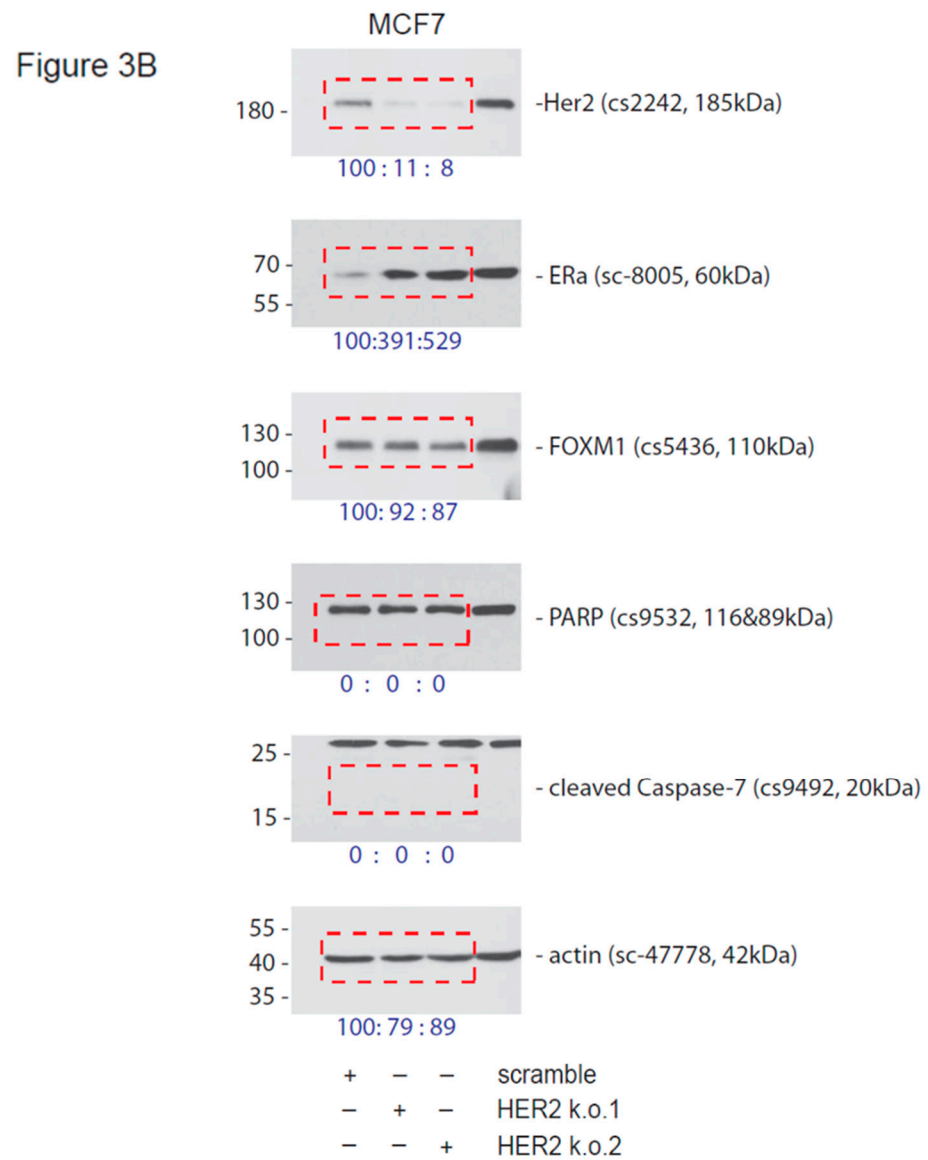

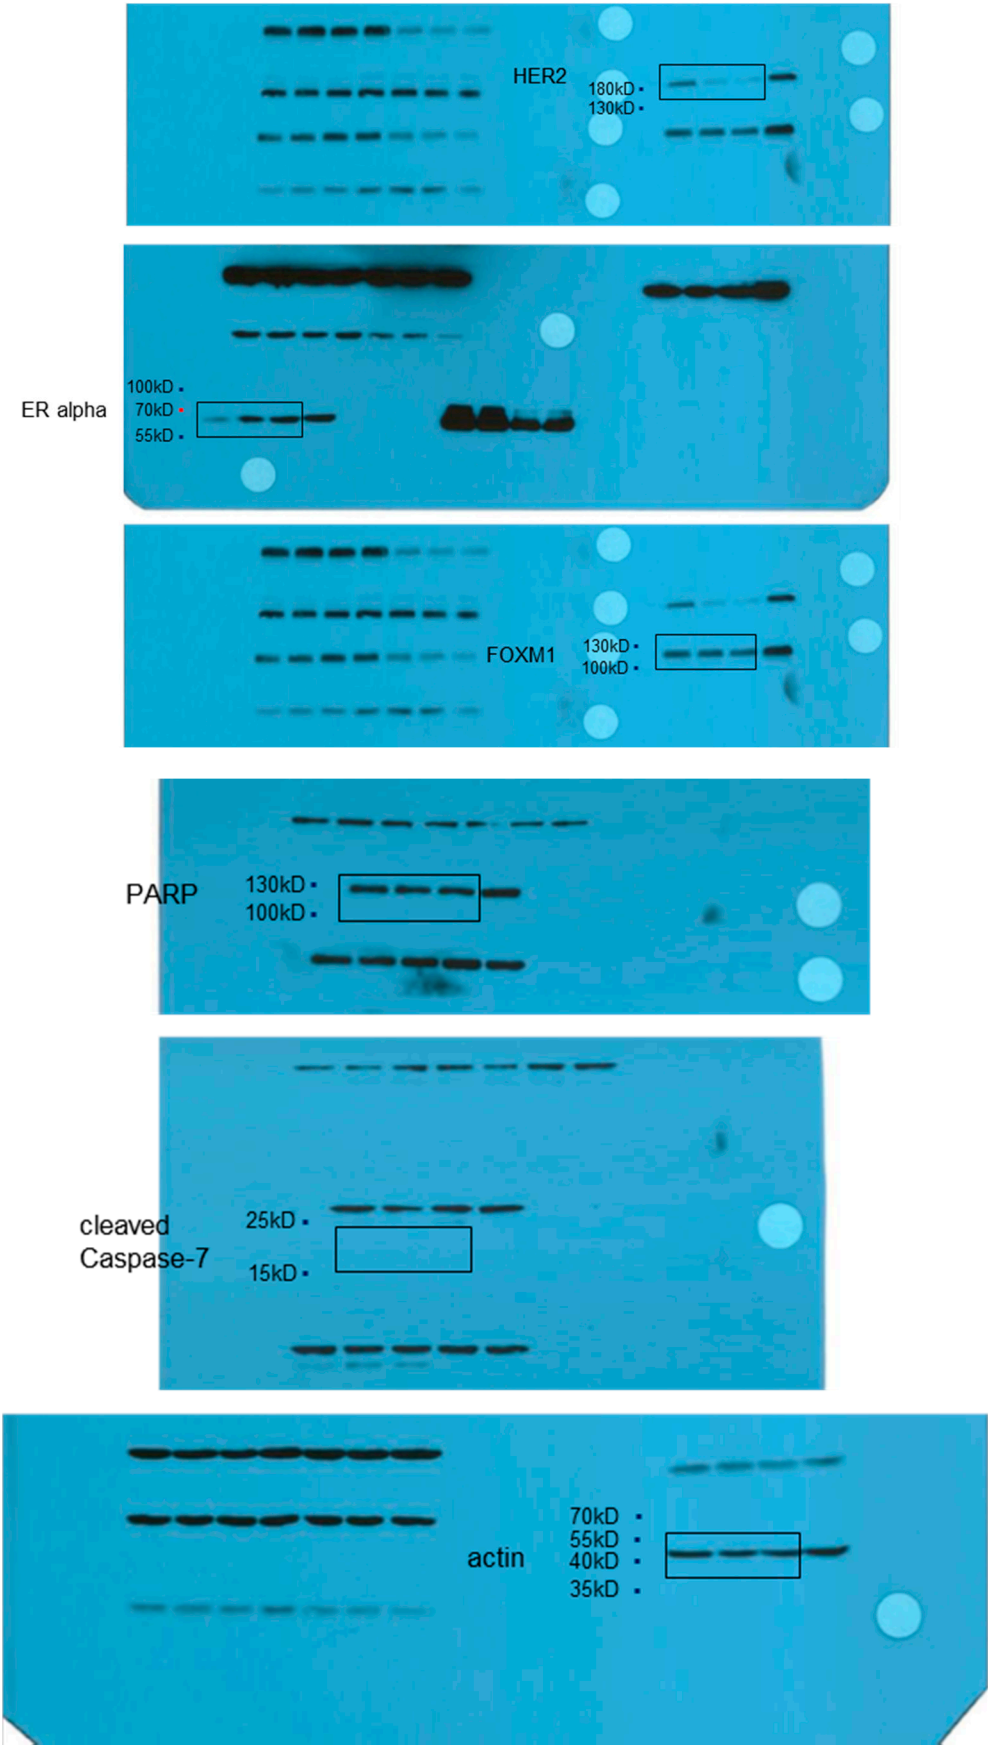

Figure 3C

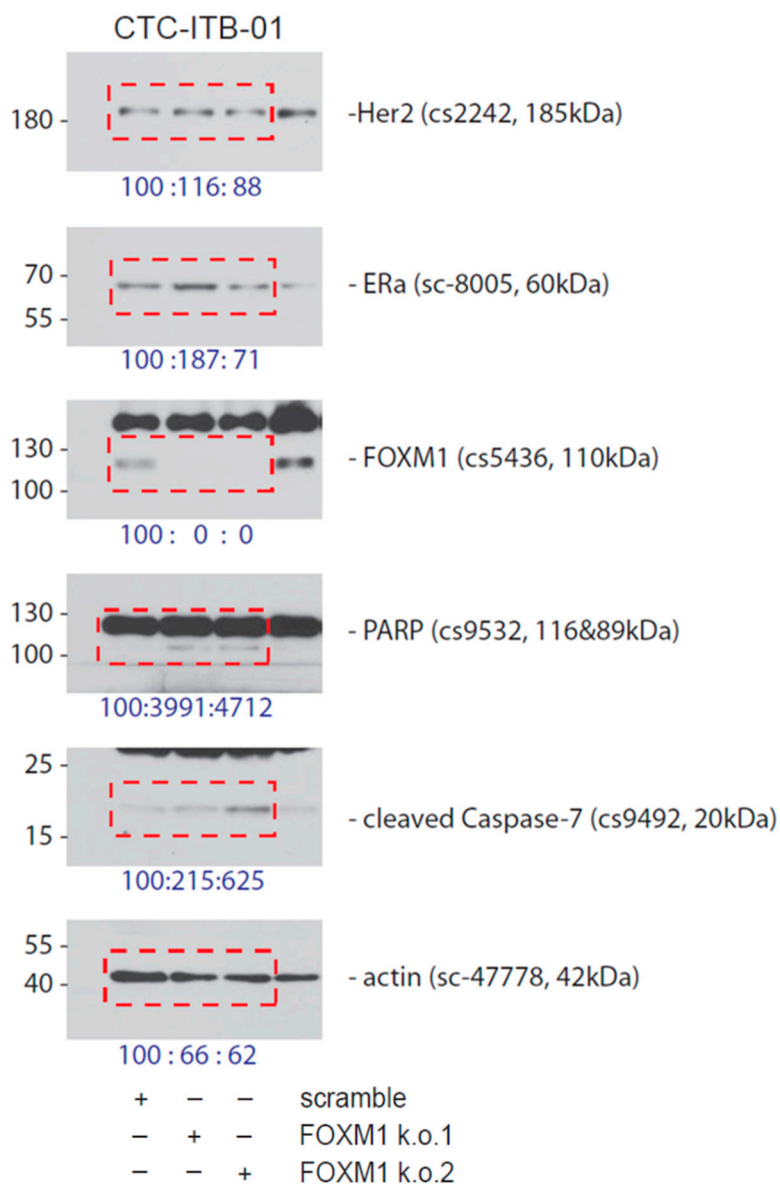

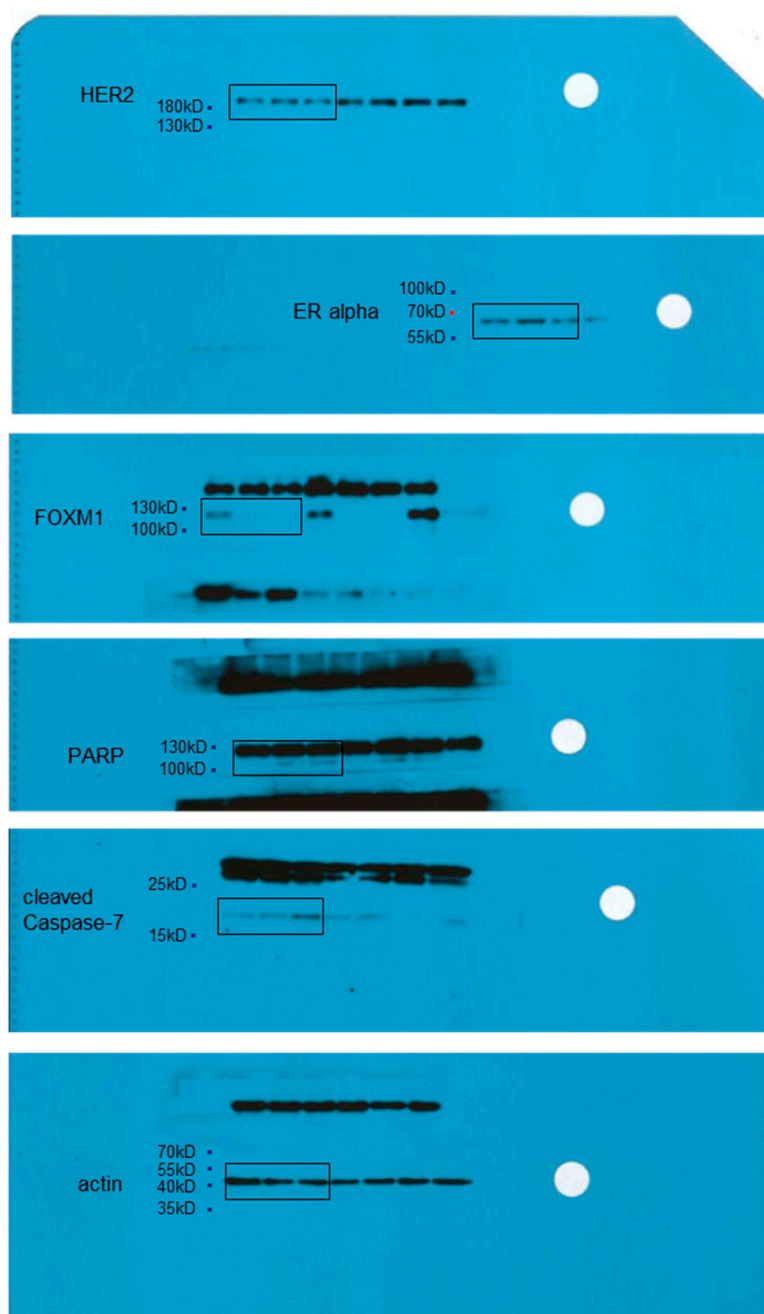



Figure 3D

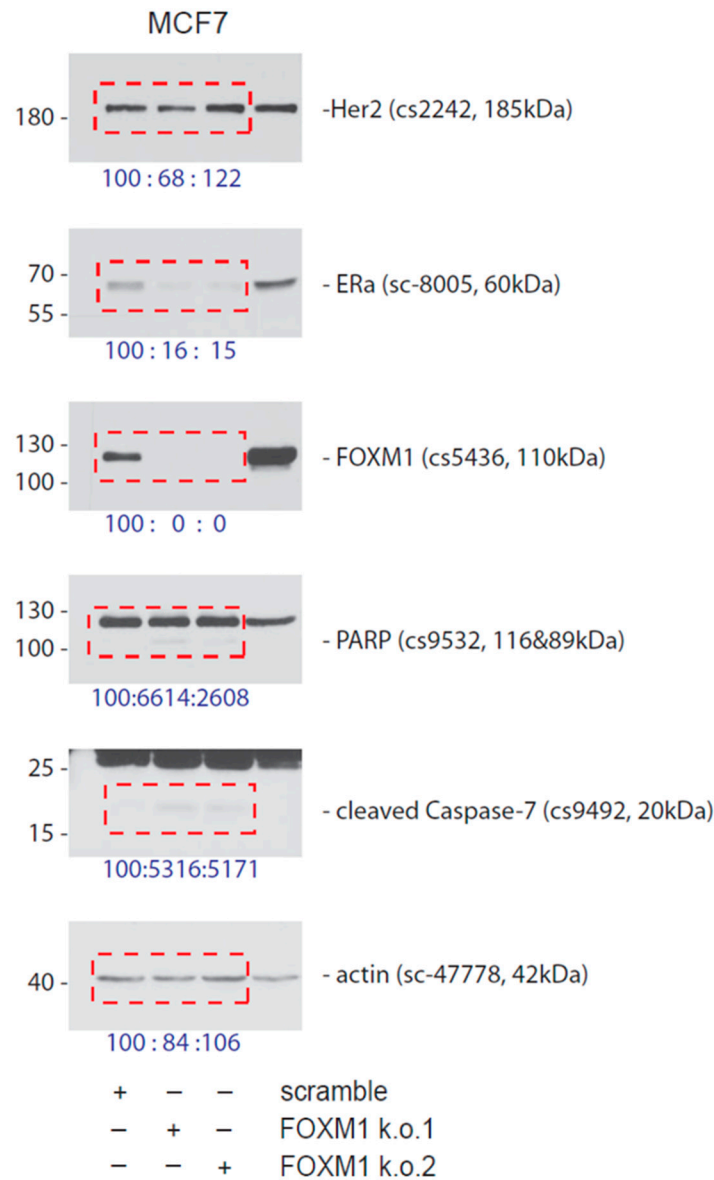

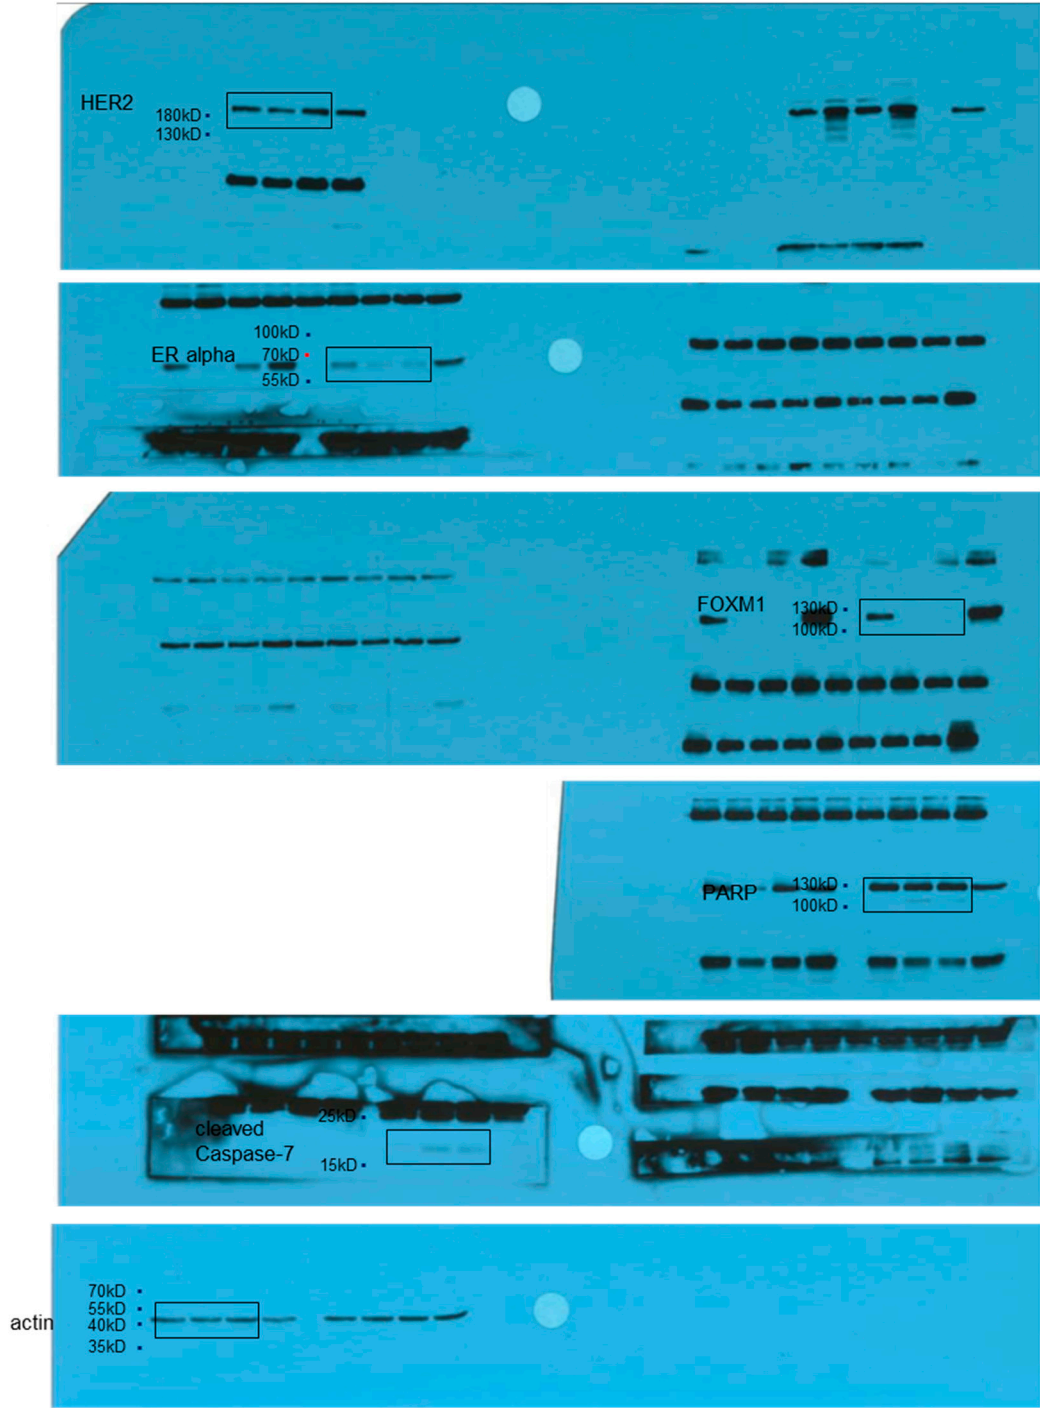

Figure 4A

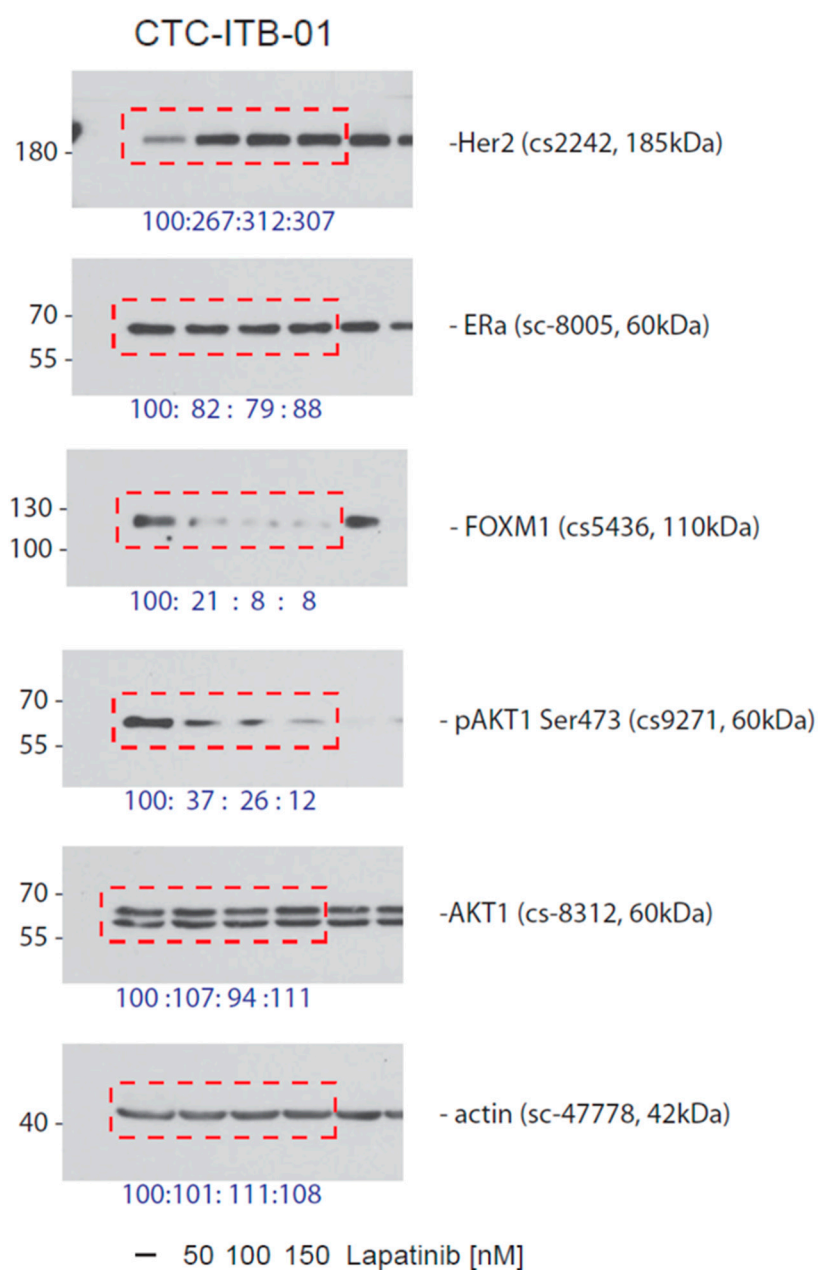

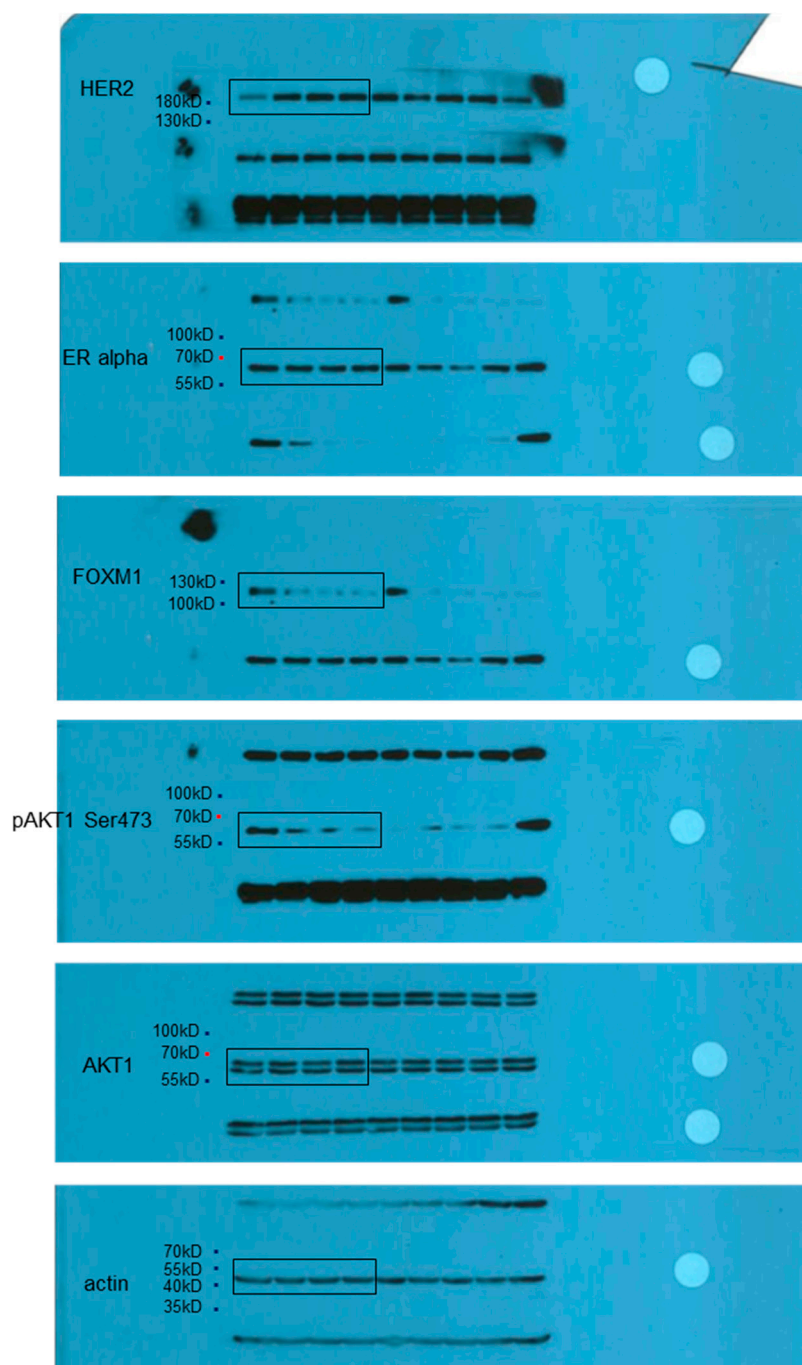

Figure 4B

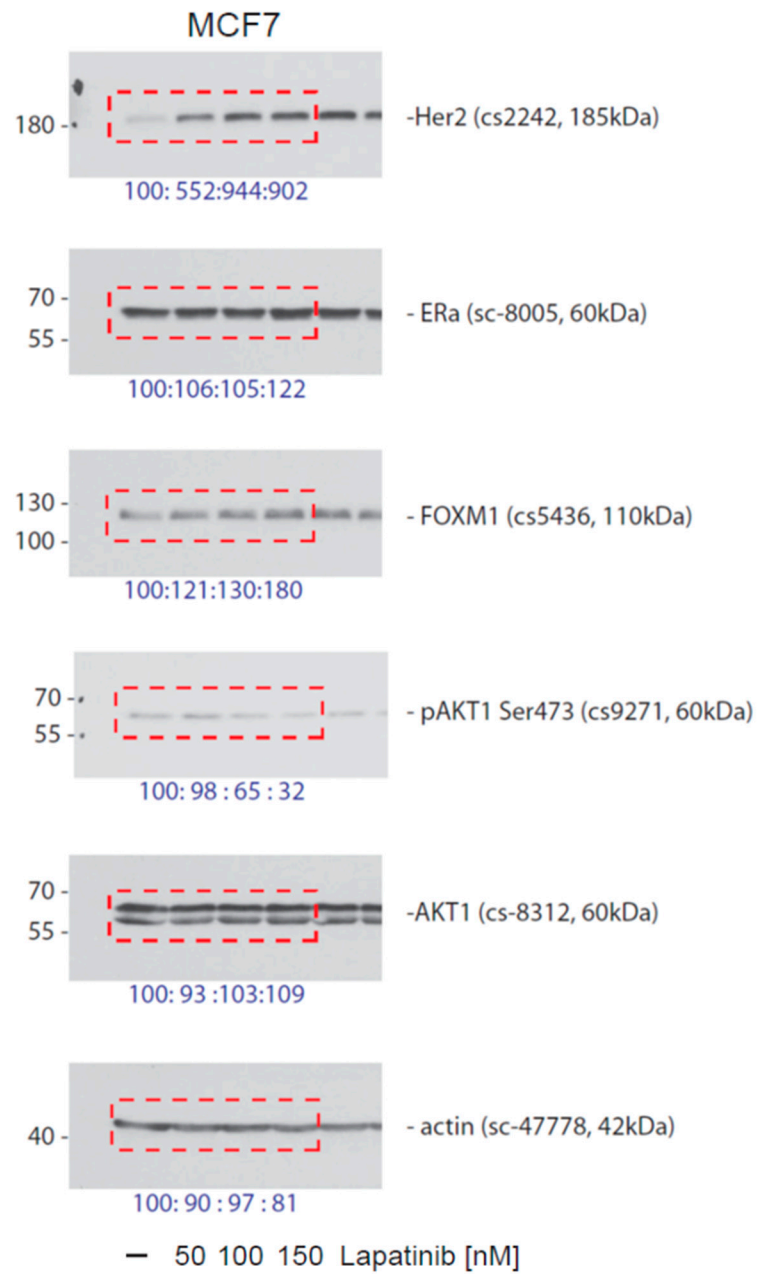



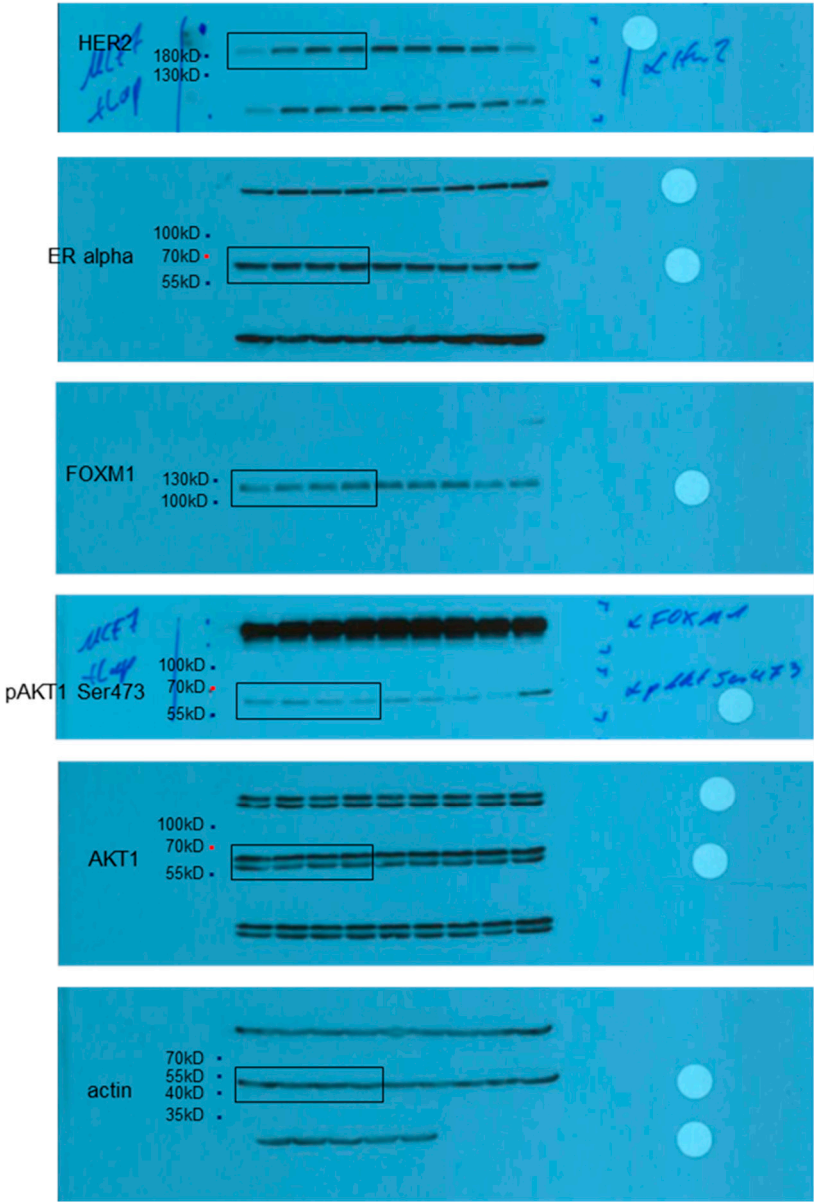

Figure 4C

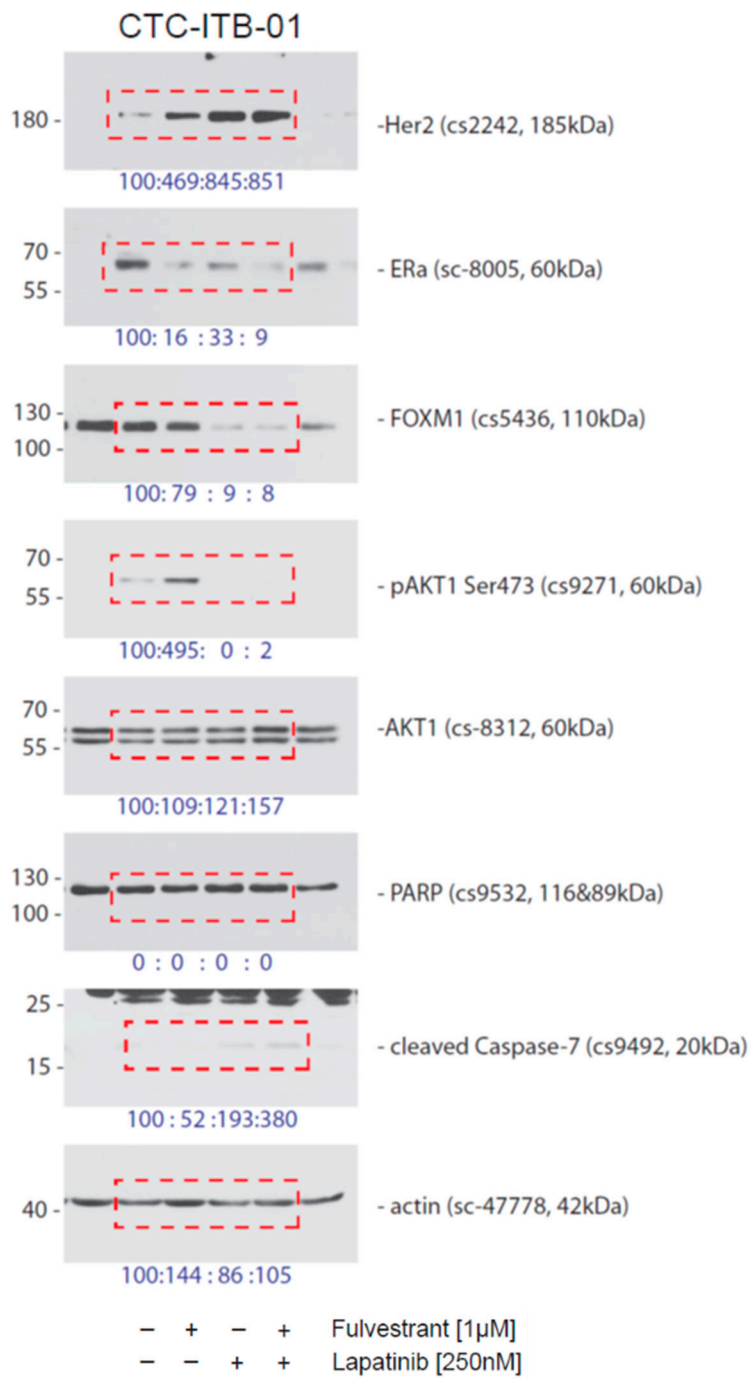

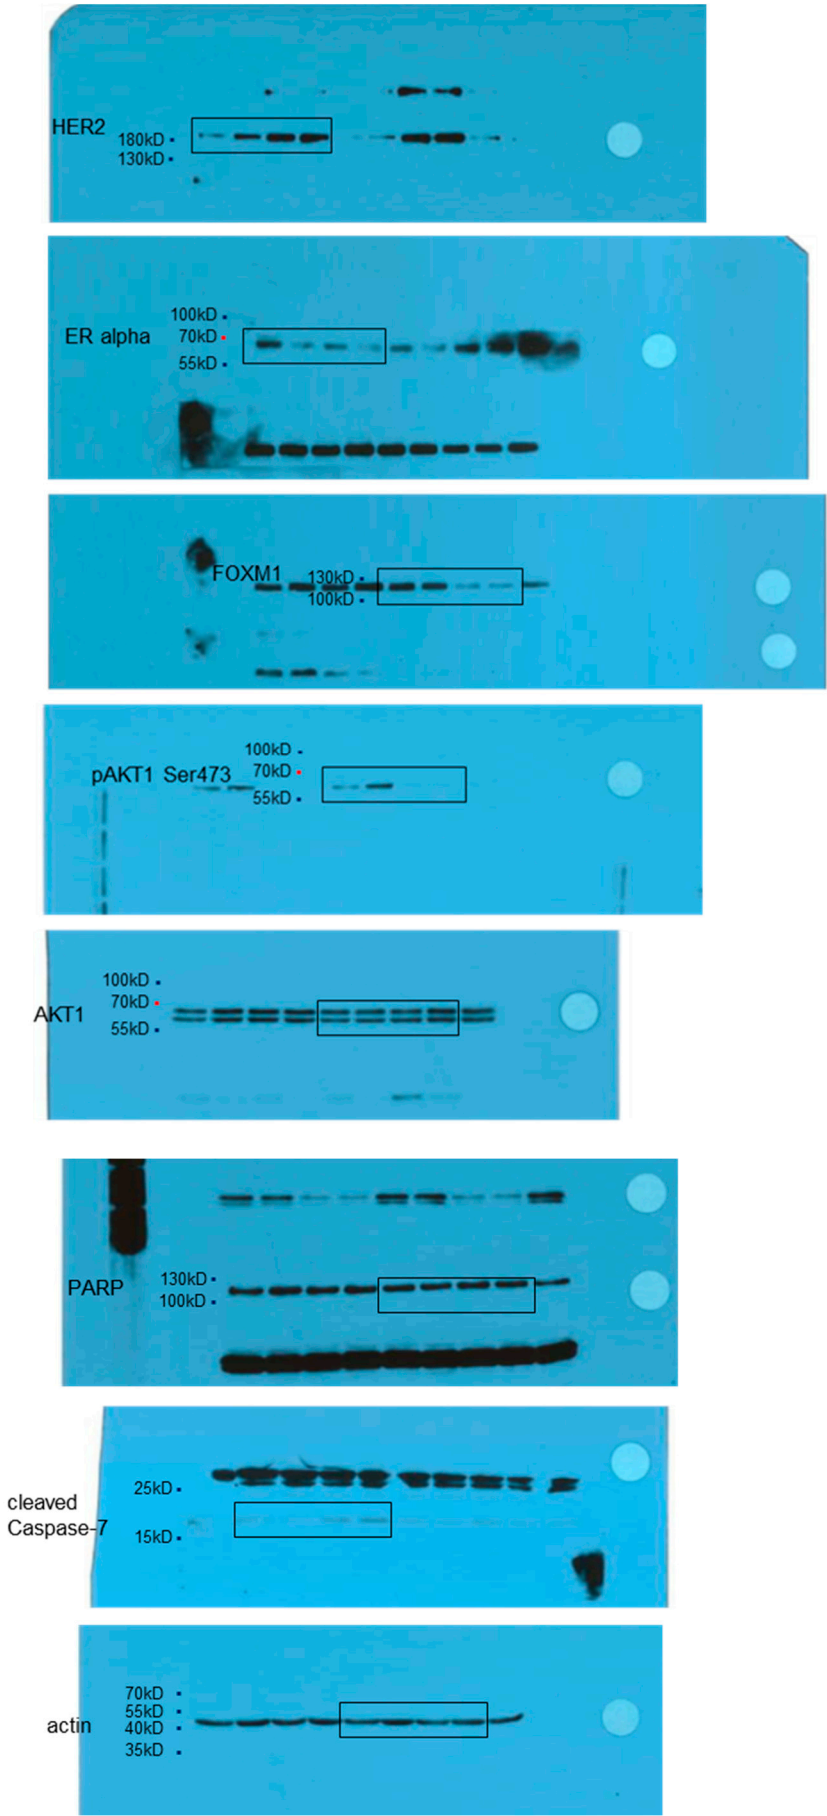

Figure 4D

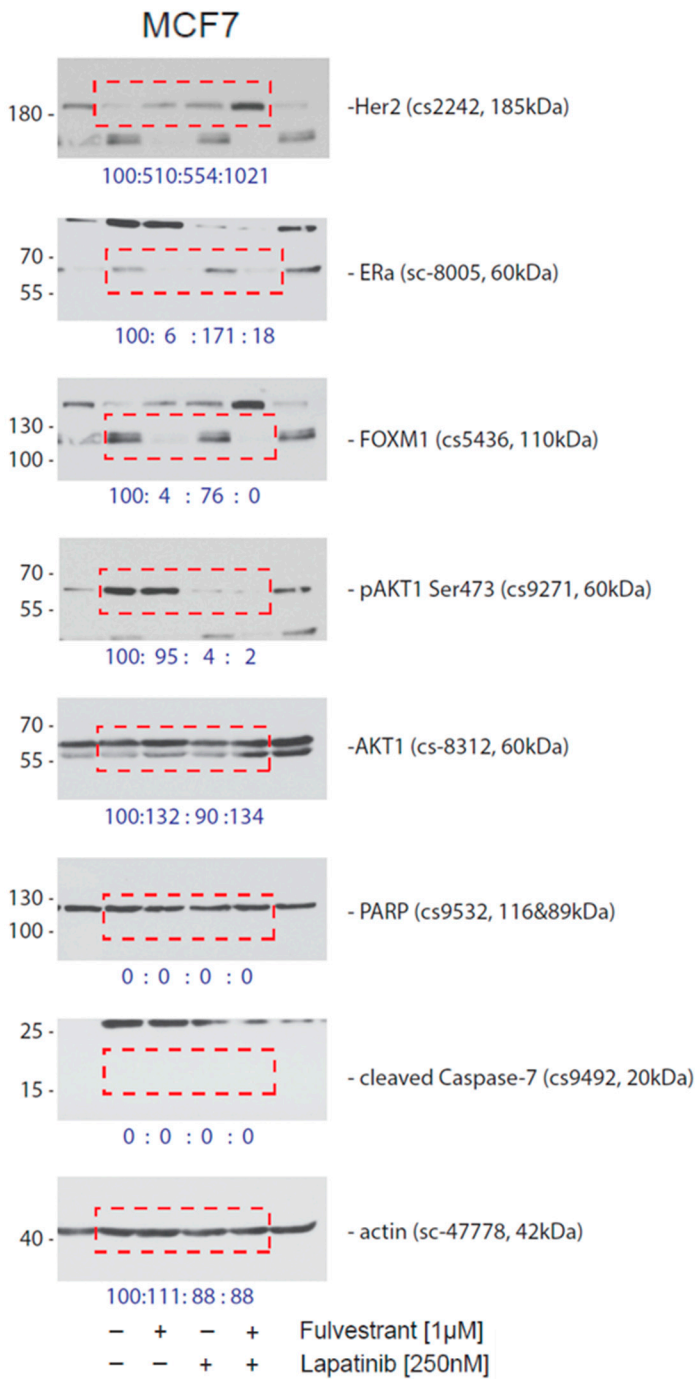

Figure 4D

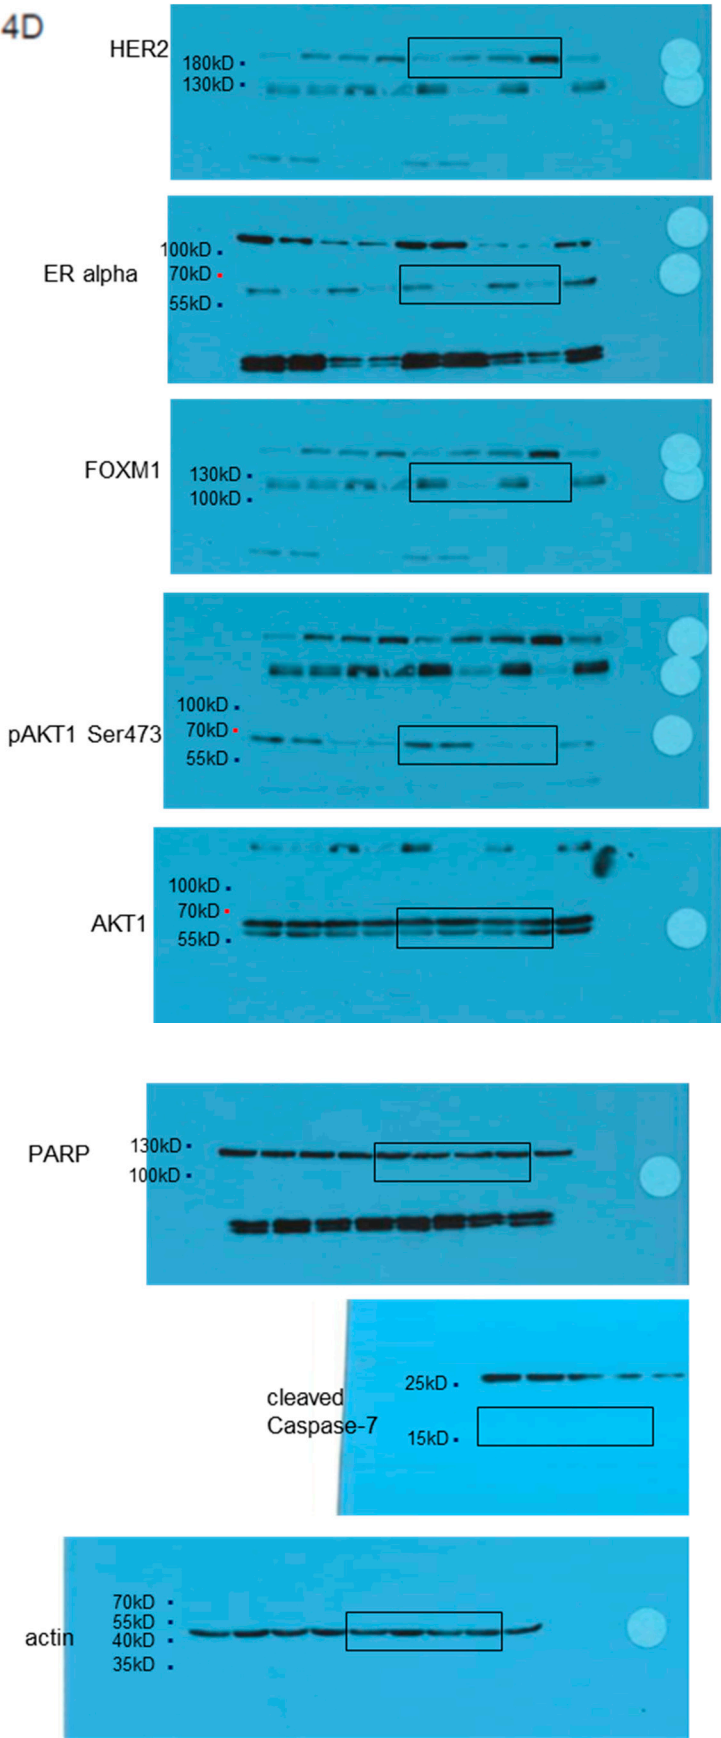

Figure 5A

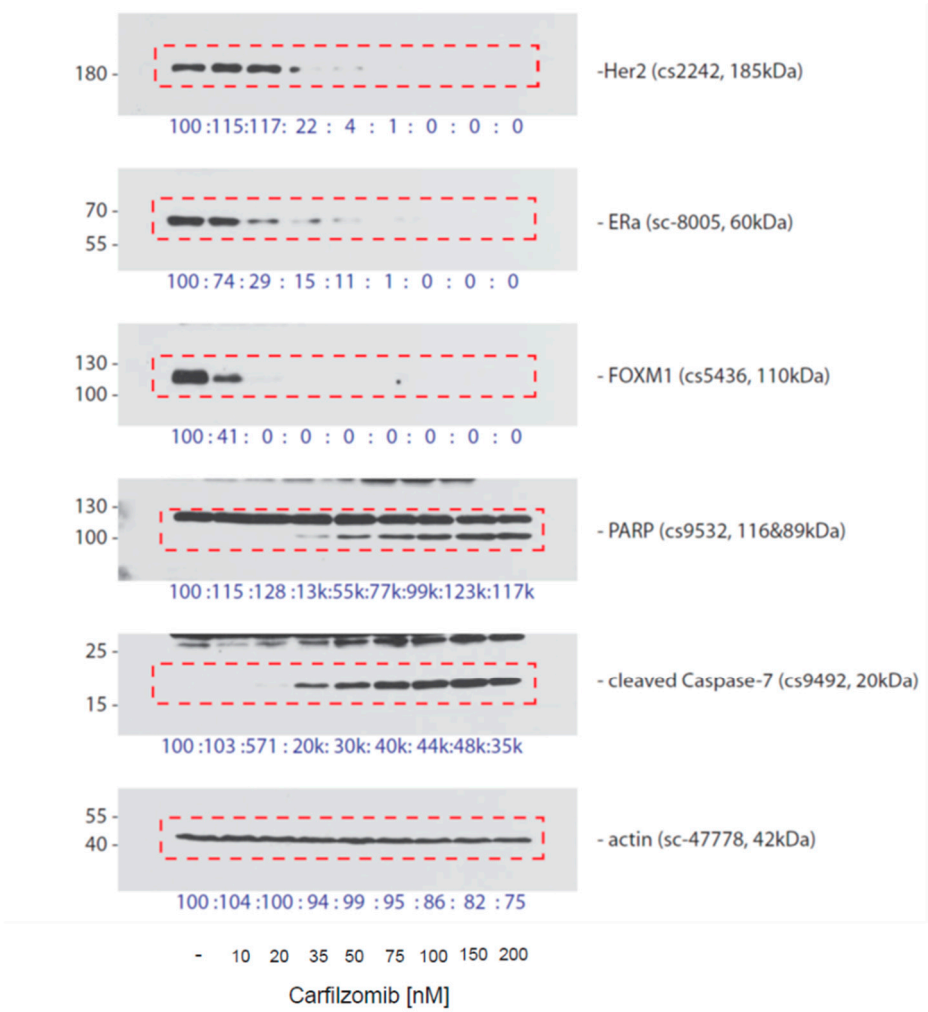

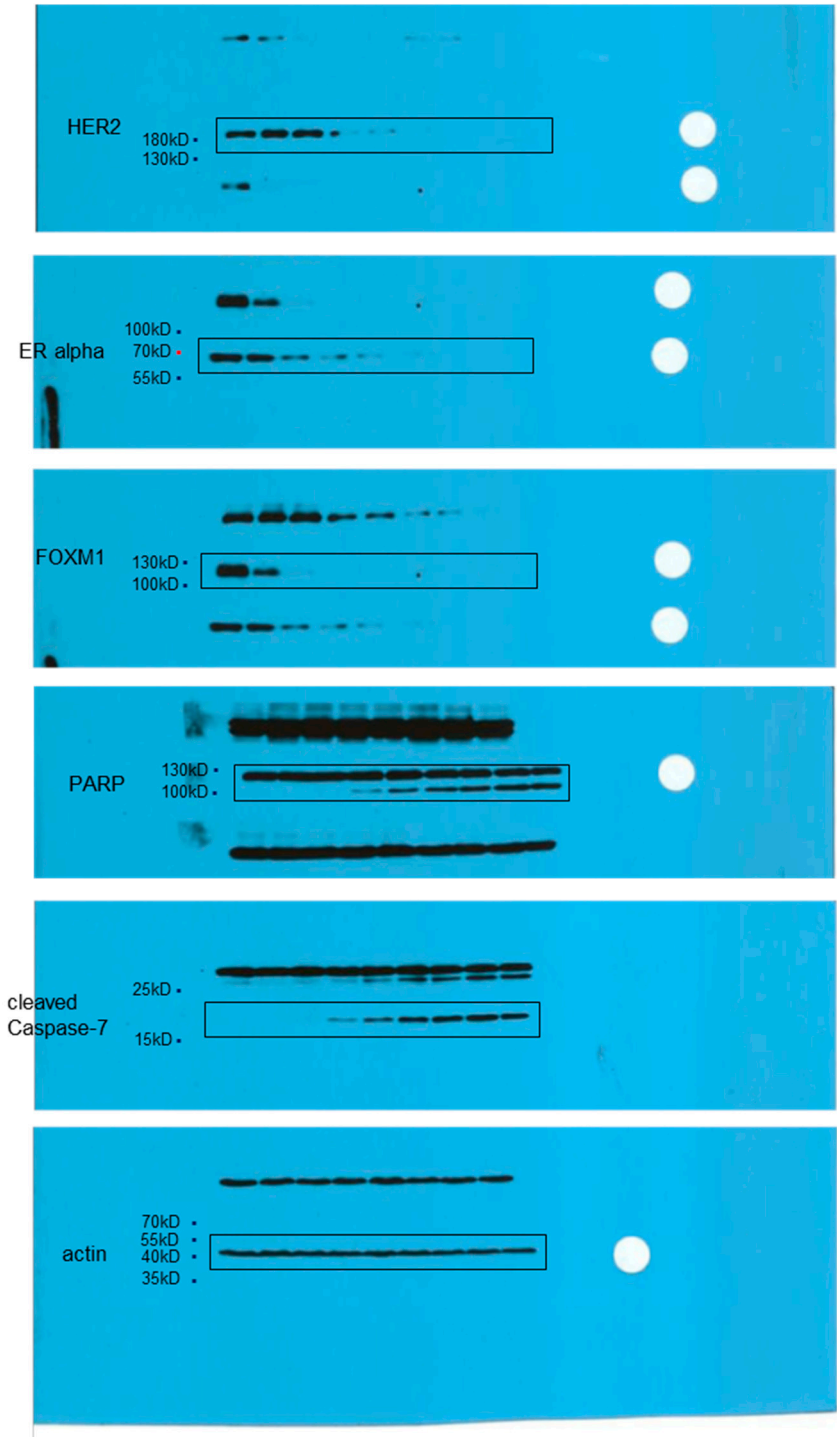

Figure 6A

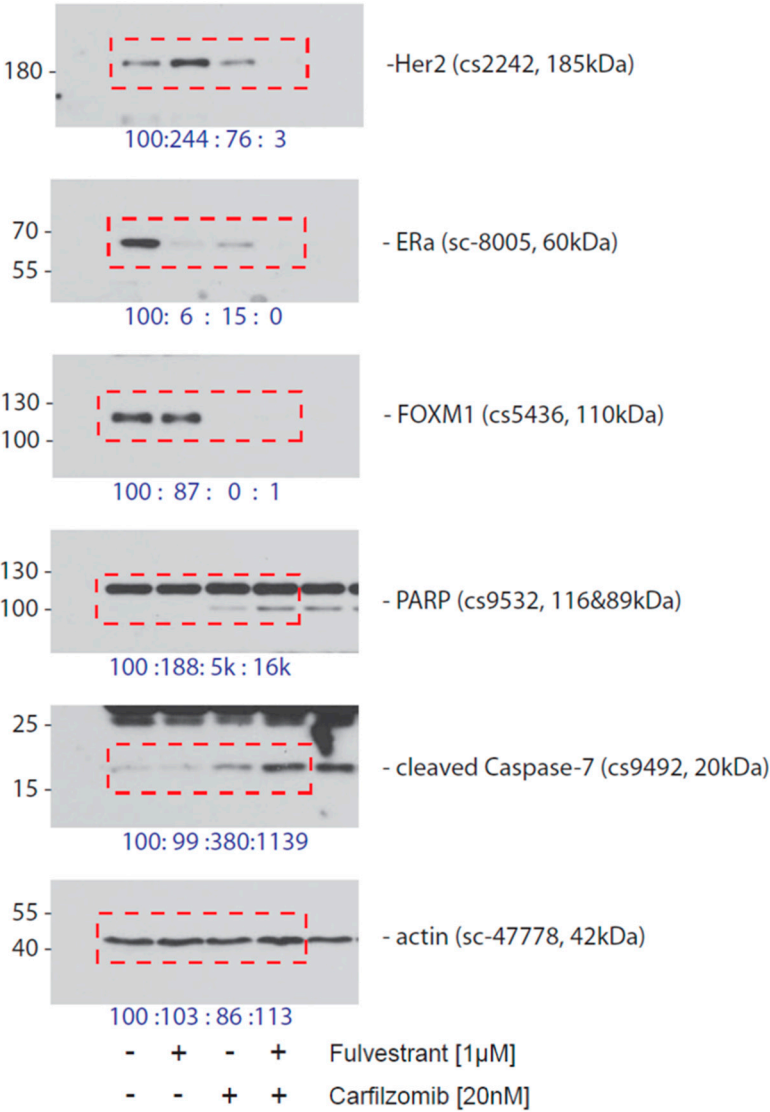



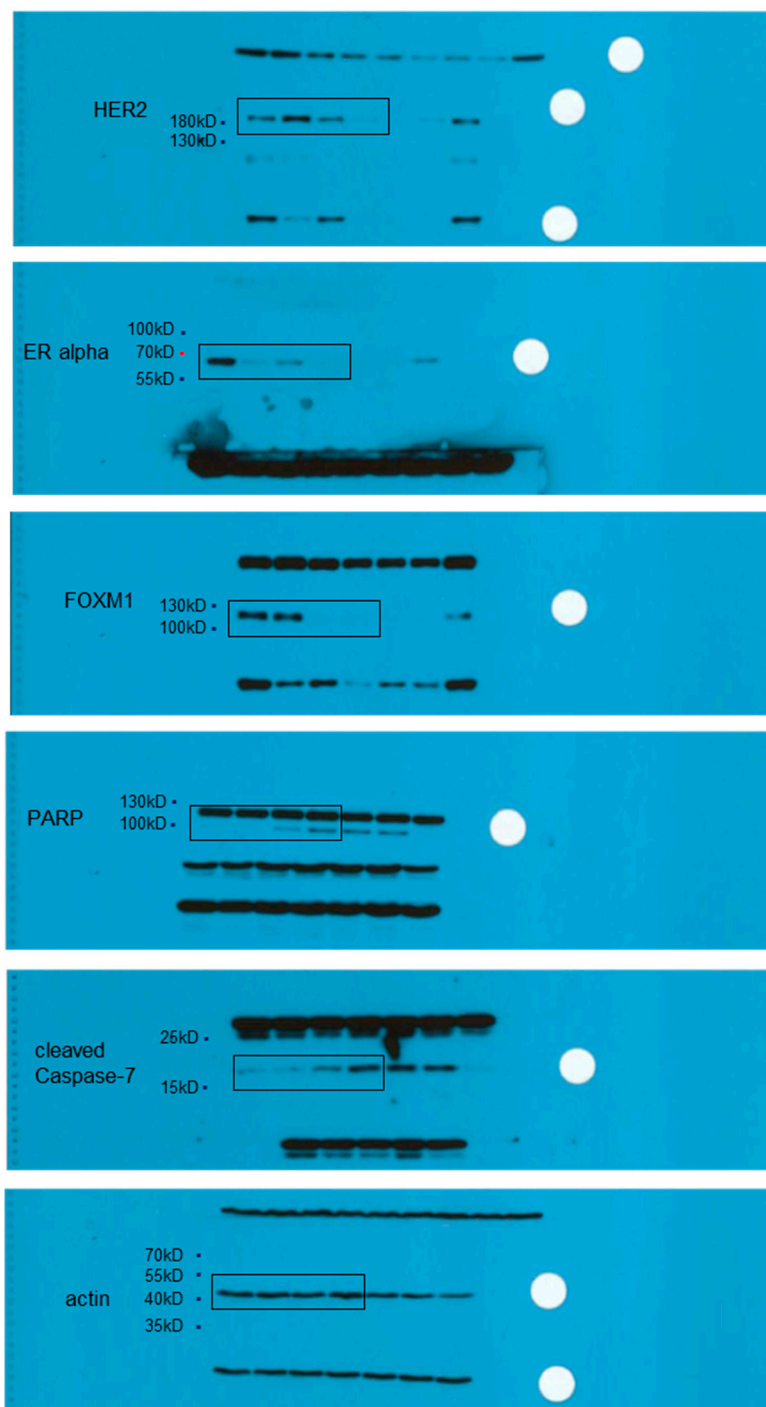

Figure 6D

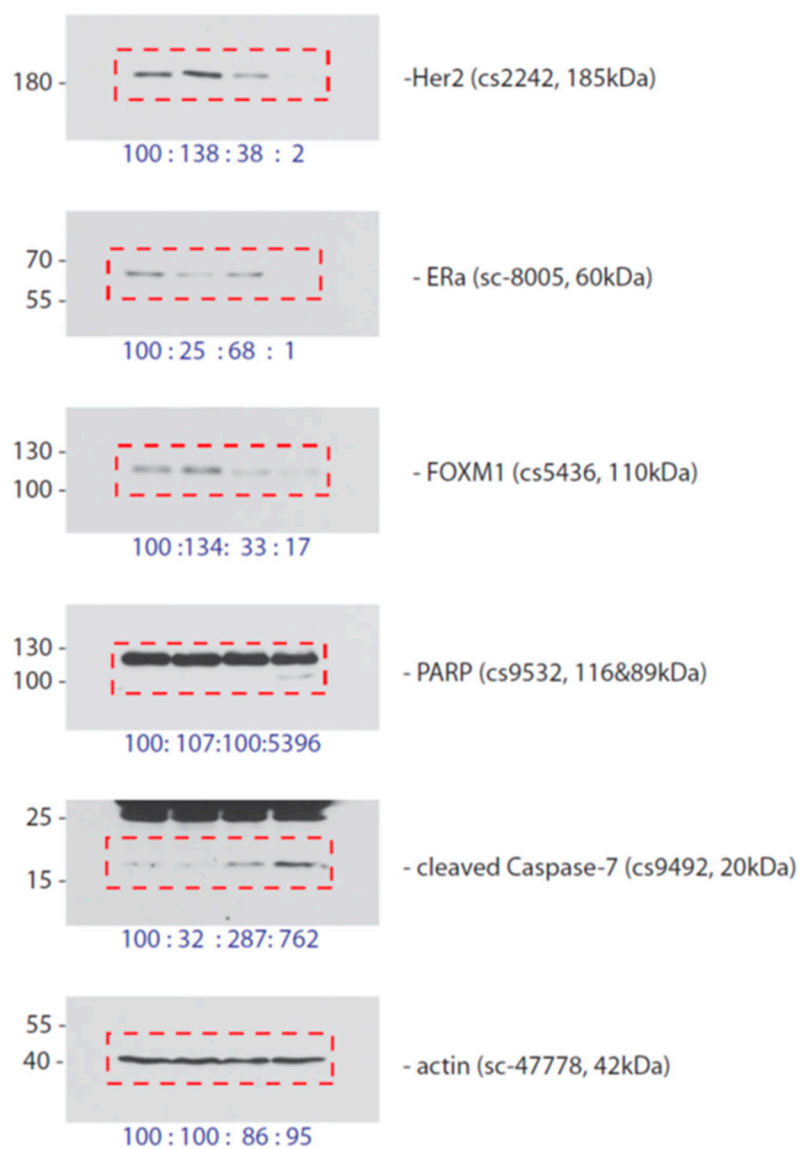

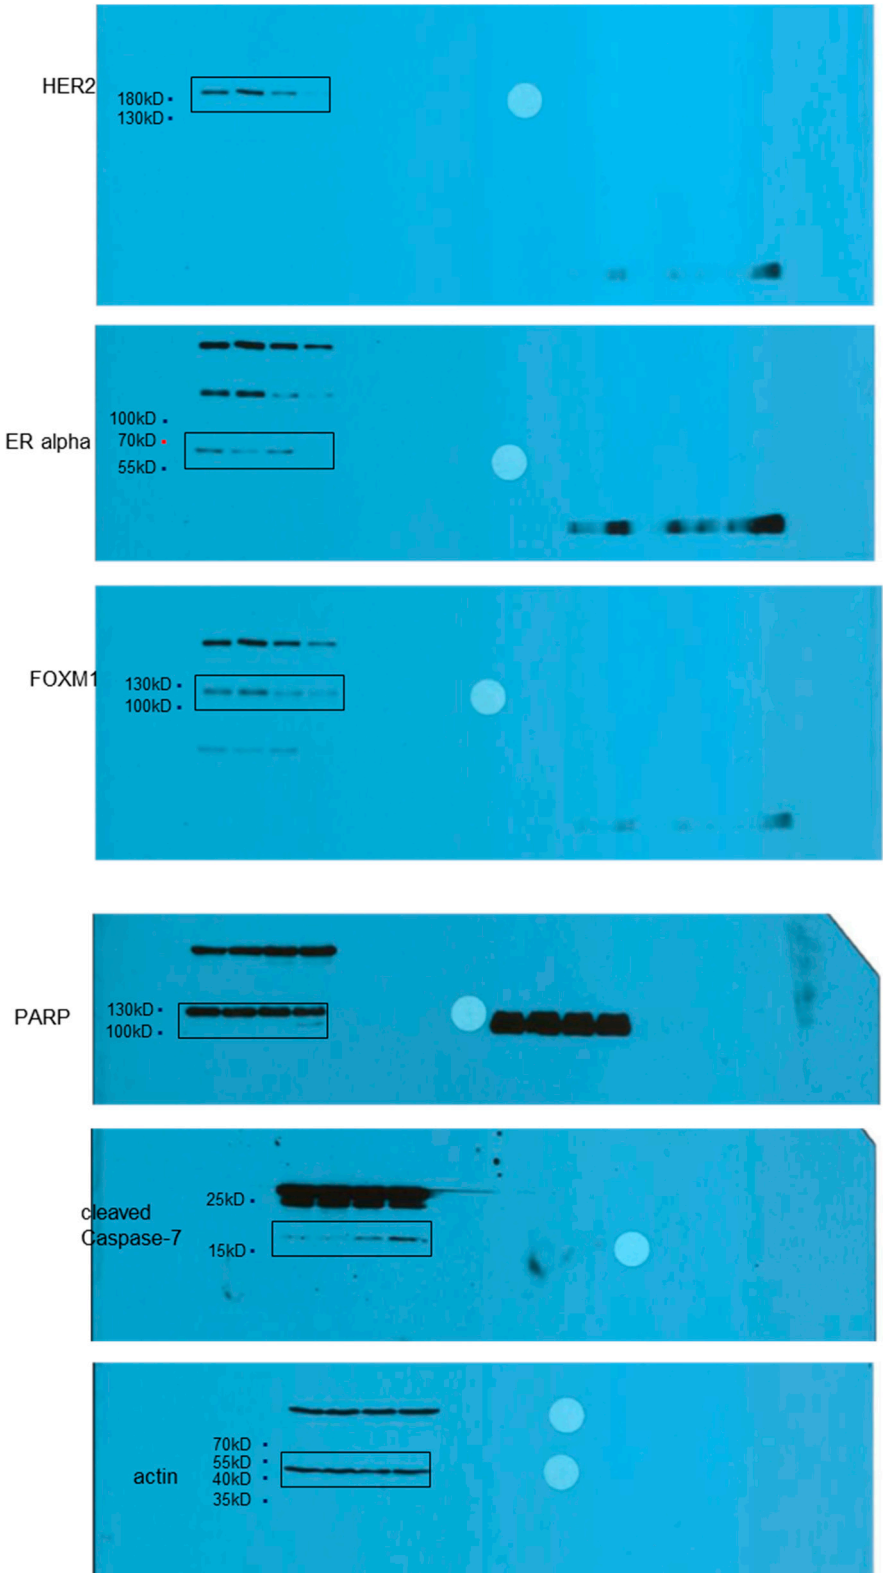

# CTC-ITB-01

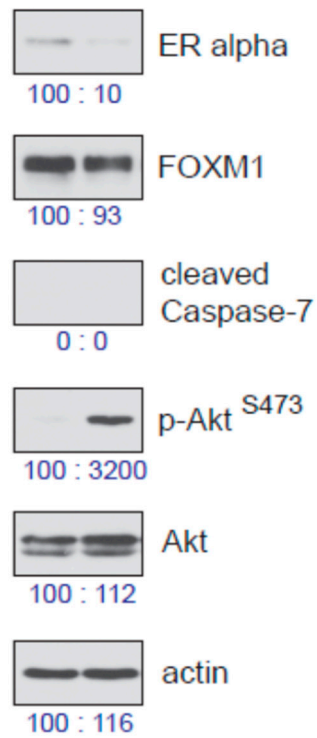

adherent  
suspension

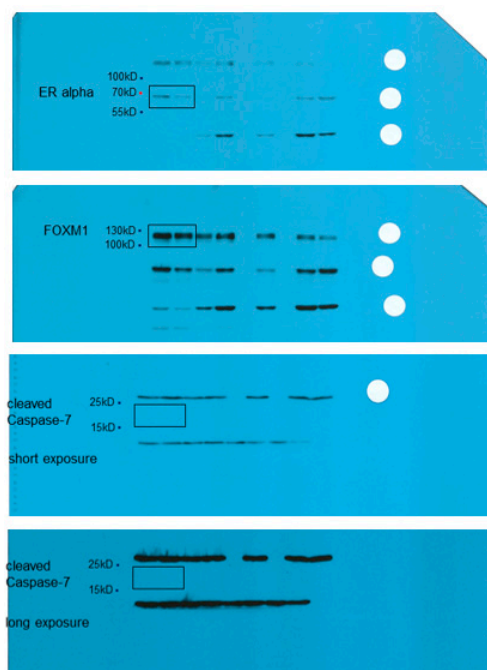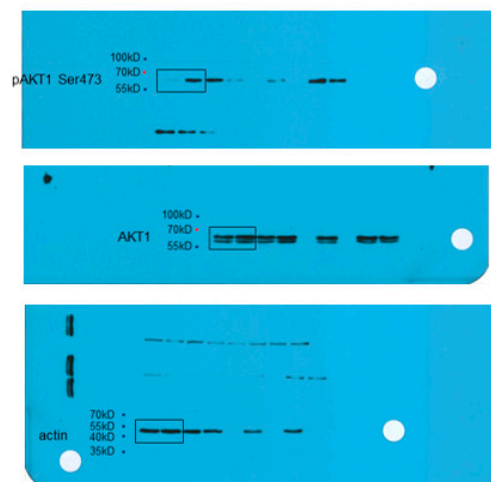

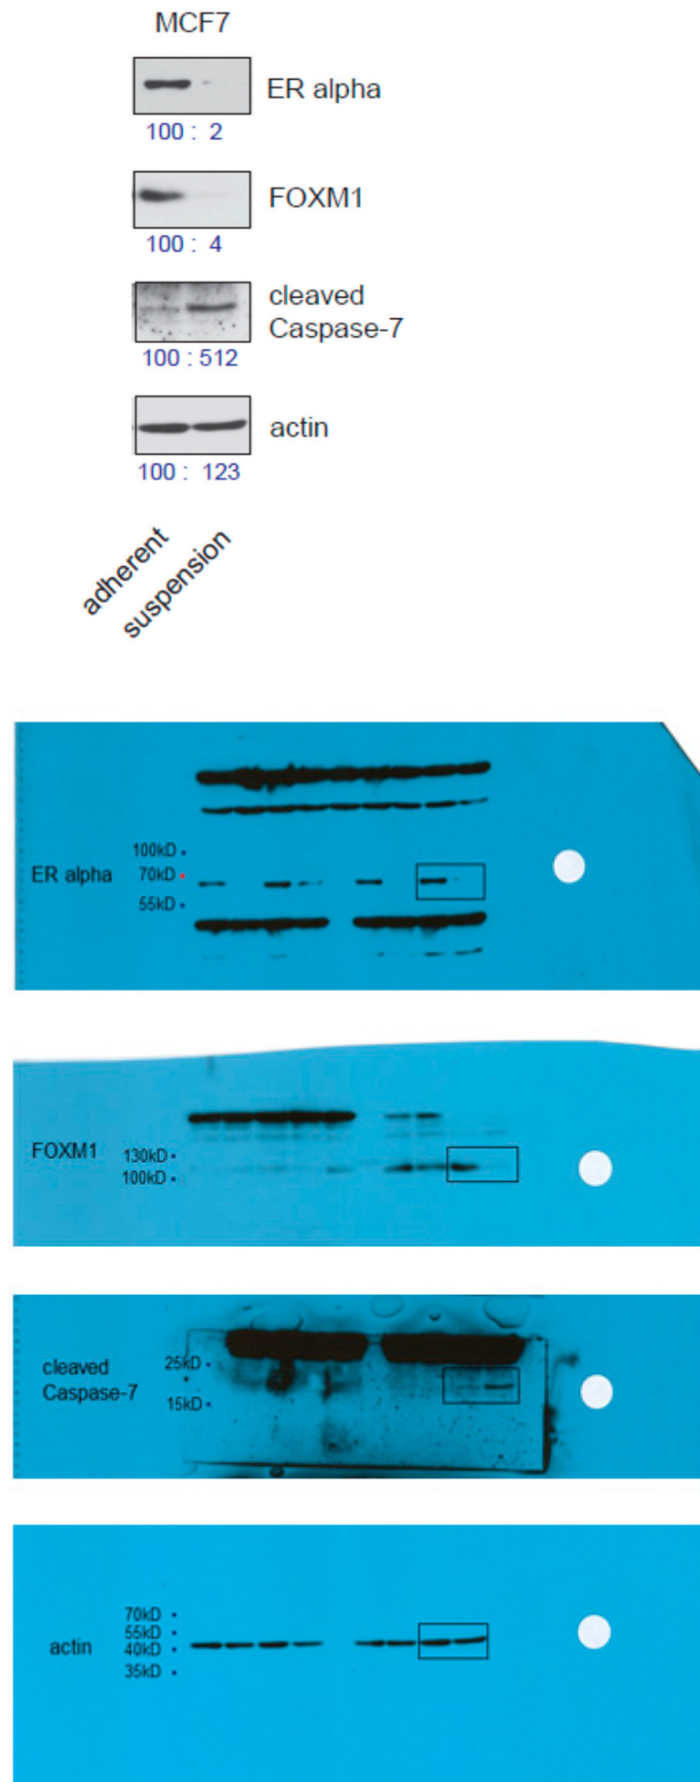

Figure S7. Original Uncropped Western Blot Images.
